1 **Optical control of ERK and AKT signaling promotes axon regeneration and functional**  
2 **recovery of PNS and CNS in *Drosophila***

3 Qin Wang<sup>1,2</sup>, Huaxun Fan<sup>3</sup>, Feng Li<sup>1,2</sup>, Savanna S. Skeeters<sup>3</sup>, Vishnu Krishnamurthy<sup>3</sup>, Yuanquan  
4 Song<sup>1,2,\*</sup>, Kai Zhang<sup>3,4,5,6,\*</sup>

5 <sup>1</sup>Raymond G. Perelman Center for Cellular and Molecular Therapeutics, The Children’s Hospital  
6 of Philadelphia, Philadelphia, PA 19104, USA

7 <sup>2</sup>Department of Pathology and Laboratory Medicine, University of Pennsylvania, Philadelphia,  
8 PA 19104, USA

9 <sup>3</sup>Department of Biochemistry, <sup>4</sup>Neuroscience Program, <sup>5</sup>Center for Biophysics and Quantitative  
10 Biology, <sup>6</sup>Beckman Institute for Advanced Science and Technology, University of Illinois at  
11 Urbana-Champaign, Urbana, IL 61801, USA

12 \*Correspondence and requests for materials should be addressed to Y.S. (email:  
13 [songy2@email.chop.edu](mailto:songy2@email.chop.edu)) or to K.Z. (email: [kaizkaiz@illinois.edu](mailto:kaizkaiz@illinois.edu)).

14

15 **Abstract**

16 Neuroregeneration is a dynamic process synergizing the functional outcomes of multiple  
17 signaling circuits. Channelrhodopsin-based optogenetics shows feasibility of stimulating neural  
18 repair but does not pin down specific signaling cascades. Here, we utilized optogenetic systems,  
19 optoRaf and optoAKT, to delineate the contribution of the ERK and AKT signaling pathways to  
20 neuroregeneration in live *Drosophila* larvae. We showed that optoRaf or optoAKT activation not  
21 only enhanced axon regeneration in both regeneration competent and incompetent sensory  
22 neurons in the peripheral nervous system, but also allowed temporal tuning and proper guidance  
23 of axon regrowth. Furthermore, optoRaf and optoAKT differ in their signaling kinetics during

24 regeneration, showing a gated versus graded response, respectively. Importantly in the central  
25 nervous system, their activation promotes axon regrowth and functional recovery of the  
26 thermnociceptive behavior. We conclude that non-neuronal optogenetics target damaged  
27 neurons and signaling subcircuits, providing a novel strategy in the intervention of neural  
28 damage with improved precision.

29

## 30 **Introduction**

31 Inadequate neuroregeneration remains a major roadblock towards functional recovery after  
32 nervous system damage such as stroke, spinal cord injury (SCI), and multiple sclerosis.  
33 Extracellular factors from oligodendrocyte, astroglial, and fibroblastic sources restrict axon  
34 regrowth (Liu et al. 2006; Yiu and He 2006; Liu et al. 2011; Lu et al. 2014; Schwab and  
35 Strittmatter 2014) but eliminating these molecules only allows limited sprouting (Sun and He  
36 2010), suggesting a down-regulation of the intrinsic regenerative program in injured neurons  
37 (Sun and He 2010; He and Jin 2016). The neurotrophic signaling pathway, which regulates  
38 neurogenesis during embryonic development, represents an important intrinsic regenerative  
39 machinery (Ramer et al. 2000). For instance, elimination of the PTEN phosphatase, an  
40 endogenous brake for neurotrophic signaling, yields axonal regeneration (Park et al. 2008).

41 An important feature of the neurotrophin signaling pathway is that the functional  
42 outcome depends on signaling kinetics (Marshall 1995) and subcellular localization (Watson et  
43 al. 2001). Indeed, neural regeneration from damaged neurons is synergistically regulated by  
44 multiple signaling circuits in space and time. However, pharmacological and genetic approaches  
45 do not provide sufficient spatial and temporal resolutions in the modulation of signaling  
46 outcomes in terminally differentiated neurons *in vivo*. Thus, the functional link between

47 signaling kinetics and functional recovery of damaged neurons remains unclear. The emerging  
48 non-neuronal optogenetic technology uses light to control protein-protein interaction and enables  
49 light-mediated signaling modulation in live cells and multicellular organisms (Zhang and Cui  
50 2015; Khamo et al. 2017; Johnson and Toettcher 2018; Leopold et al. 2018; Dagliyan and Hahn  
51 2019; Goglia and Toettcher 2019). By engineering signaling components with photoactivatable  
52 proteins, one can use light to control a number of cellular processes, such as gene transcription  
53 (Motta-Mena et al. 2014; Wang et al. 2017), phase transition (Shin et al. 2017; Dine et al. 2018),  
54 cell motility (Wu et al. 2009) and differentiation (Khamo et al. 2019), ion flow across  
55 membranes (Kyung et al. 2015; Ma et al. 2018), and metabolism (Zhao et al. 2018; Zhao et al.  
56 2019), to name a few. We have previously developed optogenetic systems named optoRaf  
57 (Zhang et al. 2014; Krishnamurthy et al. 2016) and optoAKT (Ong et al. 2016), which allow for  
58 precise control of the Raf/MEK/ERK and AKT signaling pathways, respectively. We  
59 demonstrated that timed activation of optoRaf enables functional delineation of ERK activity in  
60 mesodermal cell fate determination during *Xenopus laevis* embryonic development  
61 (Krishnamurthy et al. 2016). However, it remains unclear if spatially localized, optogenetic  
62 activation of ERK and AKT activity allows for subcellular control of cellular outcomes.

63 In this study, we used optoRaf and optoAKT to specifically activate the Raf/MEK/ERK  
64 and AKT signaling subcircuits, respectively. We found that both optoRaf and optoAKT activity  
65 enhanced axon regeneration in the regeneration-potent class IV da (C4da) and the regeneration-  
66 incompetent class III da (C3da) sensory neurons in *Drosophila* larvae, although optoRaf but not  
67 optoAKT enhanced dendritic branching. Temporally programmed and spatially restricted light  
68 stimulation showed that optoRaf and optoAKT differ in their signaling kinetics during  
69 regeneration and that both allow spatially guided axon regrowth. Furthermore, using a

70 thermonociception based behavioral recovery assay, we found that optoRaf and optoAKT  
71 activation led to effective axon regeneration as well as functional recovery after central nervous  
72 system (CNS) injury. We note that most of previous optogenetic control of neural repair studies  
73 were based on channelrhodopsin in *C. elegans* (Sun et al. 2014), mouse DRG culture (Park et al.  
74 2015a) or motor neuron-schwann cell co-culture (Hyung et al. 2019). Another study used blue-  
75 light activatable adenylyl cyclase bPAC to stimulate neural repair in mouse refractory axons  
76 (Xiao et al. 2015). These work highlights the feasibility of using optogenetics to study neural  
77 repair but did not pin down the exact downstream signaling cascade mediating neuronal repair.  
78 Additionally, most studies focused on peripheral neurons that are endogenously regenerative.  
79 Here, we specifically activated the ERK and AKT signaling pathways and performed a  
80 comprehensive study of neural regeratnion in both peripheral nervous system (PNS) and CNS  
81 neurons in live *Drosophila*. We envision that features provided by non-neuronal optogenetics,  
82 including reversibility, functional delineation, and spatiotemporal control will lead to a better  
83 understanding of the link between signaling kinetics and functional outcome of neurotrophic  
84 signaling pathways during neuroregeneration.

85

## 86 **Results**

### 87 **Light enables reversible activation of the Raf/MEK/ERK and AKT signaling pathways**

88 To reversibly control the Raf/MEK/ERK and AKT signaling pathways, we constructed a single-  
89 transcript optogenetic system using the p2A bicistronic construct that co-expresses fusion-  
90 proteins with the N-terminus of cryptochrome-interacting basic-helix-loop-helix (CIBN) and the  
91 photolyase homology region of cryptochrome 2 (CRY2PHR, abbreviated as CRY2 in this work).  
92 Following a similar design of the optimized optoRaf (Krishnamurthy et al. 2016), we improved



93 the previous optogenetic AKT system (Ong et al. 2016) with two tandem CIBNs (referred to as  
94 optoAKT in this work) (Supplemental Fig. S1A). Consistent with previous studies, the association  
95 of CIBN and CRY2 took about 1 second and the CIBN-CRY2 complex dissociated in the dark  
96 within 10 minutes (Kennedy et al. 2010; Zhang et al. 2014). The fusion of Raf or AKT does not  
97 affect the association and dissociation kinetics of CIBN and CRY2 and multiple cycles of CRY2-  
98 CIBN association and dissociation can be triggered by alternating light-dark treatment  
99 (Supplemental Fig. S1B-S1D, Movie S1, S3). Activation of optoRaf and optoAKT resulted in  
100 nuclear translocation of ERK-EGFP (Fig. 1A, Movie S2) and nuclear export of FOXO3-EGFP  
101 (Fig. 1B, Movie S4) resolved by live-cell fluorescence imaging, indicative of activation of the  
102 ERK and AKT signaling pathways, respectively.

103 Western blot analysis on pERK (activated by optoRaf) in HEK293 cells showed that  
104 pERK activity (Fig. 1C) increased within 10 min blue light stimulation and returned to the basal  
105 level 30 min after the blue light was shut off (Fig. 1D). There was a slight decrease of pERK  
106 activity upon optoRaf activation for over 10 min, likely due to a negative feedback, which has  
107 been consistently observed in previous studies (Zhou et al. 2017). On the other hand, continuous  
108 light illumination maintained a sustained activation of pCRY2-mCh-AKT (referred to as  
109 optoAKT in this work) within an onset of 10 min (Fig. 1E). The inactivation kinetics of pAKT  
110 was 30 min, similar to that of pERK (Fig. 1F, 1G). Note we use only the phosphorylated and  
111 total forms of CRY2-mCh-AKT to quantify the light response of optoAKT because the  
112 endogenous AKT does not respond to light.

113

114 **optoRaf and optoAKT do not show crosstalk activity at the pERK and pAKT level**

115 Binding of neurotrophins to their receptor activates multiple downstream signaling subcircuits  
116 including the Raf/MEK/ERK, AKT, and phospholipase C $\gamma$  (PLC $\gamma$ ) pathways. Delineation of  
117 signaling outcomes of individual subcircuits remains difficult with pharmacological assays given  
118 the unpredictable off-targets of small-molecule drugs. We hypothesized that optoRaf and  
119 optoAKT could delineate signaling outcomes because they bypass ligand binding and activate  
120 the intracellular signaling pathway. To test this hypothesis, we probed phosphorylated proteins  
121 including pERK, pAKT, and pPLC $\gamma$  with WB analysis in response to light-mediated activation  
122 of optoRaf and optoAKT. Results show that optoRaf activation does not increase pAKT and  
123 pPLC $\gamma$  (Fig. 1H, 1I). Similarly, optoAKT activation does not increase pERK or pPLC $\gamma$  (Fig. 1H,  
124 1I). Thus, at the ERK and AKT level, optoRaf and optoAKT do not show crosstalk activity in  
125 mammalian cells.

126

### 127 **Activation of optoRaf but not optoAKT enhances PC12 cell neuritogenesis**

128 We verified that activation of optoRaf enhances PC12 cell neuritogenesis, which is consistent  
129 with previous studies (Zhang et al. 2014; Krishnamurthy et al. 2016). The neuritogenesis ratio is  
130 defined as the ratio between the number of transfected cells with at least one neurite longer than  
131 the size of the cell body and the total number of transfected cells. Twenty-four hours of blue light  
132 stimulation ( $0.2 \text{ mW/cm}^2$ ) increased the neuritogenesis ratio from the basal level ( $0.24 \pm 0.04$ ) to  
133  $0.52 \pm 0.03$  (Fig. 1J, 1L). Light-mediated activation of optoAKT, on the other hand, did not  
134 increase the neuritogenesis ratio ( $0.23 \pm 0.04$  in the dark versus  $0.20 \pm 0.02$  under light) (Fig. 1K,  
135 1L). A membrane-targeted Raf1 (Raf1-GFP-CaaX) was used as a positive control, which caused  
136 significant neurite outgrowth independent of light treatment ( $0.65 \pm 0.01$  in the dark versus  $0.63$   
137  $\pm 0.01$  under light). Expression of CIBN2-GFP-CaaX (without CRY2-Raf1), a negative control,

138 did not increase PC12 neurite outgrowth either in the dark ( $0.20 \pm 0.02$ ) or under light ( $0.14 \pm$   
139  $0.01$ ) (Fig. 1L).

140

### 141 **Activation of optoRaf but not optoAKT increases sensory neuron dendrite branching in fly** 142 **larvae**

143 To determine the efficacy of the optogenetic tools *in vivo*, we generated transgenic flies with  
144 inducible expression of optoRaf (*UAS-optoRaf*) and optoAKT (*UAS-optoAKT*). We induced the  
145 expression of the transgenes in a type of fly sensory neurons, the dendritic arborization (da)  
146 neurons, which have been used extensively to study dendrite morphogenesis and remodeling (Gao  
147 et al. 1999; Grueber et al. 2002; Sugimura et al. 2003; Kuo et al. 2005; Williams and Truman  
148 2005; Kuo et al. 2006; Williams et al. 2006; Parrish et al. 2007). Using the *pickpocket* (*ppk*)-  
149 *Gal4*, we specifically expressed optoRaf in the class IV da (C4da) neurons, to test whether light  
150 stimulation would activate the Raf/MEK/ERK pathway. At 72 hours after egg laying (h AEL),  
151 wild-type (WT) and optoRaf-expressing larvae were anesthetized with ether and subjected to  
152 wholefield continuous blue light for 5 min, while as a control, another transgenic group was  
153 incubated in the dark. The larval body walls were then dissected and immunostained with the  
154 pERK1/2 antibody, as a readout of the Raf/MEK/ERK pathway activation. We found that,  
155 compared with the optoRaf-expressing larvae incubated in the dark and WT larvae, light  
156 stimulation significantly increased the pERK signal in the cell body of C4da neurons in optoRaf-  
157 expressing larvae (Fig. 2A), leading to 3.5-fold increase in fluorescence intensity (Fig. 2B).  
158 Similarly, in C4da neurons expressing optoAKT, the 5-min blue light stimulation significantly  
159 increased the fluorescence intensity of phospho-p70 S6 kinase (phospho-p70<sup>S6K</sup>) (Fig. 2C, 2D),  
160 which functions downstream of AKT (Lizcano et al. 2003; Miron et al. 2003). These results

161 collectively demonstrate that blue light is sufficient to activate the optogenetic effectors in flies  
162 *in vivo*.

163 We next investigated if optoRaf or optoAKT activation would affect neural development  
164 such as dendrite morphogenesis. We labeled C4da neurons with *ppk-CD4tdGFP* and  
165 reconstructed the dendrites of the lateral C4da neurons – v'ada. Without light stimulation, the  
166 dendrite complexity of neurons in transgenic larvae was comparable to that of WT (Fig. 2F, 2G).  
167 However, optoRaf activation resulted in a significant increase in both total dendrite length and  
168 branch number, while optoAKT activation exhibited a slight reduction in dendritic branching  
169 (Fig. 2E-2G). These results confirm the possibility of independently activating the  
170 Raf/MEK/ERK and AKT signaling pathways in flies with our optogenetic tools, prompting us to  
171 test the feasibility of their *in vivo* applications, such as promoting axon regeneration with high  
172 spatial and temporal resolution.

173

#### 174 **Activation of optoRaf or optoAKT results in enhanced axon regeneration in the PNS**

175 Administration of neurotrophins to damaged peripheral neurons results in functional regeneration  
176 of sensory axons into the adult spinal cord in rat (Ramer et al. 2000). Here, our photoactivatable  
177 transgenic flies empower precise spatiotemporal control of the neurotrophic signaling in live  
178 animals. To test whether light-mediated activation of the Raf/MEK/ERK or AKT signaling  
179 subcircuits would also promote axon regrowth, we used a previously described *Drosophila* da  
180 sensory neuron injury model (Song et al. 2012; Song et al. 2015). Da neurons have been shown  
181 to possess distinct regeneration capabilities among different sub-cell types, and between the PNS  
182 and CNS, resembling mammalian neurons (Song et al. 2012; Song et al. 2015). In particular, the  
183 C4da neurons regenerate their axons robustly after peripheral injury, while the C3da neurons

184 largely fail to regrow. Moreover, the axon regeneration potential of C4da neurons is also  
185 diminished after CNS injury. First, we asked whether optoRaf or optoAKT activation can  
186 enhance axon regeneration in the regeneration-competent C4da neurons in the PNS. We severed  
187 the axons of C4da neurons (labeled with *ppk-CD4tdGFP*) with a two-photo laser at 72 h AEL,  
188 verified axon degeneration at 24 h after injury (AI) and assessed axon regeneration at 48 h AI. At  
189 this time point, about 79% C4da neurons in WT showed obvious axon regrowth, and the  
190 regeneration index (Song et al. 2012; Song et al. 2015), which refers to the increase in axon  
191 length normalized to larval growth (Supplementary Fig. 2A, 2B, and Materials and Methods),  
192 was  $0.381 \pm 0.066$  (Fig. 3A-3C). Strikingly, C4da neurons expressing optoRaf or optoAKT  
193 showed further enhanced regeneration potential in response to blue light, leading to a significant  
194 increase in the regeneration index (*optoRaf*:  $0.682 \pm 0.115$ ; *optoAKT*:  $0.735 \pm 0.078$ ), while there  
195 was no difference between WT and unstimulated transgenic flies (Fig. 3A-3C). In order to test  
196 the potential synergy between optoRaf and optoAKT, we co-expressed both in C4da neurons.  
197 While there is a slight increase in the regeneration percentage, activation of both ERK and AKT  
198 pathways in the same neuron did not further increase the regeneration index ( $0.7387 \pm 0.08390$ )  
199 (Fig. 3A-3C). This suggests that these two subcircuits may share the same downstream  
200 components in promoting axon regeneration. Alternatively, activation of the ERK or AKT  
201 pathway by optogenetics may be strong enough to cause a saturation effect in C4da neurons axon  
202 regeneration.

203 The light stimulation paradigm used in the aforementioned *in vivo* experiments was  
204 constant blue light applied immediately after injury. We reason that intermittent light stimulation  
205 may provide insights into the signaling kinetics *in vivo* and fine-tune axon regeneration dynamics.  
206 Therefore, instead of constant blue light on, we delivered two sets of programmed light patterns

207 to injured larvae, 15 min on-15 min off or 15 min on-45 min off per cycle for 48 h (Fig. 3D). We  
208 found that, for optoRaf-expressing C4da neurons, when the off-time was 15 min, the intermittent  
209 light stimulation was sufficient to accelerate axon regrowth, with both the regeneration index  
210 ( $0.6352 \pm 0.09627$ ) and regeneration percentage significantly increased compared to larvae  
211 incubated in the dark (Fig. 3E, 3F). However, when the off-time was 45 min, the intermittent  
212 light failed to promote axon regeneration (Fig. 3E, 3F), suggesting a threshold effect. On the  
213 other hand, C4da neurons expressing optoAKT displayed a graded response: a moderate increase  
214 of regeneration index ( $0.6278 \pm 0.09801$ ) in response to the 15 min on-15 min off light and a  
215 smaller uptick to the 15 min on-45 min off light; both were less effective than the constant light  
216 stimulation (Fig. 3E, 3F). These results suggest that although higher frequency of light  
217 stimulation generally resulted in stronger regeneration potential in the transgenic flies, constant  
218 light was not always required for maximum axon regeneration. Moreover, optoRaf and optoAKT  
219 differ in their signaling kinetics during regeneration, showing a gated versus graded response,  
220 respectively.

221 We next determined whether optoRaf or optoAKT activation would trigger regeneration  
222 in C3da neurons, which are normally incapable of regrowth (Song et al. 2012). C3da neurons  
223 were labeled with *19-12-Gal4*, *UAS-CD4tdGFP*, *repo-Gal80* and injured using the same  
224 paradigm as C4da neurons. Compared to WT, which exhibited poor axon regeneration ability  
225 demonstrated by the low regeneration percentage and the negative regeneration index ( $-0.03201$   
226  $\pm 0.02752$ ) (Fig. 3G-3I), light stimulation significantly increased the regeneration index in  
227 optoRaf- or optoAKT-expressing larvae to  $0.1298 \pm 0.04637$  or  $0.1354 \pm 0.06161$ , respectively  
228 (Fig. 3G-3I). These results indicate that optoRaf and optoAKT activation not only accelerates  
229 axon regeneration but also converts regeneration cell-type specificity.

230

231 **Spatial activation of optoRaf or optoAKT improves pathfinding of regenerating axons**

232 While C4da neurons are known to possess the regenerative potential, it is unclear whether the  
233 regenerating axons navigate correctly. To address this question, we focused on v'ada – the lateral  
234 C4da neurons. Uninjured v'ada axons grow ventrally, showing a typical turn and then join the  
235 axon bundle with the ventral C4da neurons (Supplementary Fig. 2A). We found that their  
236 regenerating axons preferentially regrew away from the original ventral trajectory. More than 60%  
237 v'ada axons bifurcated and formed two branches targeting opposite directions (Fig. 4A, 4B white  
238 bar). In the majority cases in WT, the ventral branch, which extends towards the correct  
239 trajectory, regenerated less frequently than the dorsal branch, with 15% v'ada containing only  
240 the ventral branch (Fig. 4A, 4B black bar). One possibility is that the ventral branch encounters  
241 the injury site, which may retard its elongation. As a result, only a minority of regenerating  
242 axons are capable of finding the correct path. The poor pathfinding of regenerating axons was  
243 similar among WT and the transgenic larvae, regardless of whether incubated with whole-field  
244 light or in the dark (Fig. 4B). Thus, proper guidance of the regenerating axons towards the  
245 correct trajectory remained to be resolved.

246 We thus investigated whether spatially restricted activation of the neurotrophic signaling  
247 using our optogenetic system could guide the regenerating axons. To specifically enhance the  
248 regrowth of the ventral branch, we used a confocal microscope to focus the blue light (delivered  
249 by the 488 nm argon-ion laser) on the ventral branch for 5 min at 24 h AI. The lengths of both  
250 the ventral and dorsal branches were measured at 24 h AI and 48 h AI. We subtracted the  
251 increased dorsal branch length ( $\Delta_{\text{dorsal}}$ ) from the increased ventral branch length ( $\Delta_{\text{ventral}}$ ),  
252 then divided that by the total increased length of these two branches (Fig. 4D). This value was

253 defined as the relative regeneration ratio. If the dorsal branch exhibited more regenerative  
254 potential, the ratio would be negative; otherwise, it would be positive. Without light stimulation,  
255 the relative regeneration ratio of the transgenic larvae (*optoRaf*:  $-0.6062 \pm 0.1453$ ; *optoAKT*:  $-$   
256  $0.5530 \pm 0.1011$ ) was comparable to that of WT ( $-0.5786 \pm 0.08229$ ) (Fig. 4C, 4D), confirming  
257 preferred regrowth of the dorsal branch. Strikingly, the 5-min local blue light stimulation  
258 significantly increased the ratio in *optoRaf*- or *optoAKT*-expressing *v'ada* (*optoRaf*:  $0.04762 \pm$   
259  $0.1123$ ; *optoAKT*:  $-0.1725 \pm 0.09560$ ), while this transient stimulation resulted in no difference  
260 in WT ( $-0.6018 \pm 0.1290$ ) (Fig. 4C, 4D). This result indicates that a single pulse of local light  
261 stimulation was sufficient to lead to preferential regrowth of the ventral branch. Notably,  
262 although whole-field light illumination could significantly promote axon regrowth, it failed to  
263 increase the relative regeneration ratio in transgenic larvae (Con.on *optoRaf*:  $-0.7048 \pm 0.1015$ ;  
264 Con. on *optoAKT*:  $-0.5517 \pm 0.09644$ ) (Fig. 4D), revealing the difference between activating the  
265 neurotrophic signaling in a whole neuron and a single lesioned axon branch. On the other hand,  
266 while a 5 min local light stimulation did not lead to an overall enhancement of axon regrowth, it  
267 provided adequate guidance instructions for the regenerating axons to make the correct choice.

268

## 269 **Activation of *optoRaf* or *optoAKT* promotes axon regeneration and functional recovery in** 270 **the CNS**

271 Achieving functional axon regeneration after CNS injury remains a major challenge in neural  
272 repair research. Motivated by the capacity of *optoRaf* and *optoAKT* to accelerate axon  
273 regeneration in the PNS, we went on to determine whether they also show efficacy after CNS  
274 injury. We focused on the axons of C4da neurons, which project into the ventral nerve cord  
275 (VNC) and form a ladder-like structure. Each pair of axon bundles correspond to one body



276 segment in an anterior-posterior pattern (Fig. 5A) (Li et al., submitted). We injured the  
277 abdominal A6 and A3 bundles by laser as previously described (Song et al. 2012) (Li et al.,  
278 submitted) (Supplementary Fig. 3), and confirmed axon degeneration at 24 h AI (Fig. 5A). At 48  
279 h AI, we found that axons began to extend from the retracted axon stem and towards the  
280 commissure region. We defined a commissure segment as regenerated only when at least one  
281 axon extended beyond the midline of the commissure region or joined into other intact bundles  
282 (Supplementary Fig. 3). In WT, only 16% of lesioned commissure segments displayed obvious  
283 signs of regrowth (Fig. 5A, 5B). To quantify the extent of regrowth, we measured the length of  
284 the regrown axons and normalized that to the length of a commissure segment – regeneration  
285 index (Supplementary Fig. 3, Materials and Methods). After light stimulation, the regeneration  
286 indexes of the two transgenic lines (*optoRaf*:  $5.375 \pm 0.3391$ ; *optoAKT*:  $4.765 \pm 0.4236$ ) were  
287 significantly increased compared with the WT control ( $2.643 \pm 0.3050$ ), and the percentage of  
288 regenerating commissure segments also exhibited a mild increase in both *optoRaf*- and  
289 *optoAKT*- expressing larvae (Fig. 5A-5C). On the other hand, there was no significant difference  
290 between WT and the unstimulated transgenic flies (Fig. 5A-5C). This result suggests that both  
291 signaling subcircuits reinforce C4da neuron axon regeneration in the CNS.

292 We then tested whether the axon regrowth in the CNS induced by *optoRaf* or *optoAKT*  
293 activation leads to behavioral improvement. We utilized a recently established behavioral  
294 recovery paradigm based on larval thermonociception (Fig. 6A, Materials and Methods) (Li et al.,  
295 submitted). In brief, we injured the A7 and A8 C4da neuron axon bundles in the VNC, which  
296 correspond to the A7 and A8 body segments in the periphery. We then assessed the nociceptive  
297 behavior in these larvae in response to a 47 °C heat probe applied at the A7 or A8 segments at 24  
298 and 48 h AI. Since C4da neurons are essential for thermonociception, injuring A7 and A8 axon

299 bundles in the VNC would lead to an impaired nociceptive response to the heat probe  
300 specifically at body segments A7 and A8. Indeed, all the injured larvae exhibited diminished  
301 response at 24 h AI, while the total score is approaching 3 in uninjured WT larvae (Fig. 6B). At  
302 48 h AI, substantial recovery was observed in the two transgenic groups with light stimulation,  
303 whereas WT showed very limited response and a low recovery percentage (Fig. 6B, 6C). Both  
304 the response score and the percentage of larvae exhibiting behavioral recovery in these two  
305 groups were more than twice as that of the WT, while the unstimulated groups were comparable  
306 to WT. Altogether, these results demonstrate that our optogenetic system empowers ligand-free  
307 and non-invasive control of the Raf/MEK/ERK and AKT pathways in flies, which not only  
308 promote axon regeneration after injury but also benefit functional recovery, suggesting that the  
309 regenerated axons may rewire and form functional synapses.

310

## 311 **Discussion**

312 Neurotrophins are known to activate Trk receptors and trigger the Ras/MEK/ERK, AKT, and  
313 PLC $\gamma$  pathways which are involved in cell survival, neural differentiation, axon and dendrite  
314 growth and sensation (Bibel and Barde 2000; Huang and Reichardt 2001; Chao 2003; Cheng et  
315 al. 2011; Joo et al. 2014). Here, we used optogenetic systems to achieve specific and reversible  
316 activation of the neurotrophin subcircuits including the Raf/MEK/ERK (via optoRaf) and AKT  
317 (via optoAKT) signaling pathways. We further verified that optoRaf and optoAKT did not show  
318 crosstalk at the level of phosphorylated ERK and AKT proteins, and activation of optoRaf but  
319 not optoAKT promoted PC12 cell differentiation.

320 After spinal cord injury, the synthesis of neurotrophins is elevated to support axon  
321 regrowth (Cho et al. 1998; Hayashi et al. 2000; Fukuoka et al. 2001; Fang et al. 2017). AKT

322 signaling, which functions downstream of Trk receptors, was reported to accelerate axon  
323 regeneration in fly and mammals (Song et al. 2012; Guo et al. 2016; Miao et al. 2016). However,  
324 the role of Raf/MEK/ERK signaling played during nerve repair is controversial. Although some  
325 studies revealed that ERK is involved in axon extension, others suggested that ERK activation  
326 impedes axon regeneration and functional recovery (Markus et al. 2002; Huang et al. 2017;  
327 Cervellini et al. 2018). To specifically evaluate the efficacy of Raf/MEK/ERK and AKT  
328 signaling in promoting axon regeneration, we generated fly strains with tissue-specific  
329 expression of optoRaf or optoAKT and found that light stimulation was sufficient to activate the  
330 corresponding downstream components in fly larvae *in vivo*. Consistent with previous studies  
331 (He and Jin 2016), we found that AKT activation resulted in significantly increased axon  
332 regeneration in C4da neurons as well as the regeneration-incompetent C3da neurons.  
333 Interestingly, we found that C4da and C3da neurons expressing optoRaf also exhibited greater  
334 regeneration potential in response to light stimulation. This result also corroborates with a  
335 previous finding that activated B-RAF signaling enables axon regeneration in the mammalian  
336 CNS (O'Donovan et al. 2014). We speculate that the differential outcomes of ERK activation on  
337 axon regeneration may be due to the different injury models used, and the strength and cell type  
338 origin of ERK signaling.

339         The regenerative capacity varies significantly among different neuronal subtypes, as well  
340 as the PNS and CNS. Although the administration of neurotrophins enhances axon regeneration  
341 in peripheral neurons, its capacity to promote functional regeneration in the CNS is limited, in  
342 part due to the inaccessibility of neurotrophins to reach injured axons (physical barrier) (Silver  
343 and Miller 2004; Yiu and He 2006) and innate inactivation of the regenerating program in CNS  
344 (Lu et al. 2014). OptoRaf and optoAKT could be used to address both issues by direct delivery

345 of light (rather than ligand) to reactivate the regenerating program and thereby significantly  
346 increase neural regeneration in the CNS as well. We further showed that activation of the  
347 Raf/MEK/ERK or AKT subcircuit was capable of improving behavioral performance in fly  
348 larvae, suggesting that it may promote synapse regeneration leading to functional recovery.

349         Ineffective functional recovery at least partially results from the inappropriate pathfinding  
350 of the regenerative neurons. As shown in this study, the majority of regenerating C4da neuron  
351 axons preferentially grew away from their original trajectory. We surprisingly found that  
352 delivering a 5-min light stimulation to the ventral branch, which extended towards the correct  
353 direction, was sufficient to convey guidance instructions and increase the preferential elongation  
354 of the ventral branch against the dorsal branch. Correct guidance cannot be achieved by whole-  
355 body administration of pharmacological reagents. Similarly, when casting blue light on the  
356 whole transgenic larvae, light stimulation must be given at a high frequency to promote axon  
357 regrowth (there is a threshold for the light off-time), and the dorsal branch extension was also  
358 dominant in this case. This result highlights the importance and necessity of restricted activation  
359 of neurotrophic signaling. Indeed, the strength and location of Raf/MEK/ERK and AKT  
360 activation during axon regeneration may be important to the functional consequences. Notably,  
361 although the transient restricted stimulation likely affects the decision-making of the growth cone  
362 at the branching point, constant light is still required to increase overall axon regeneration.

363         Neurotrophins are engaged in a variety of important cellular processes, and their  
364 physiological concentration is essential for the normal function of both neurons and non-  
365 neuronal cells (Rose et al. 2003; Xiao et al. 2010; Poyhonen et al. 2019). Despite exhibiting  
366 substantial efficacy for enhancing nerve regeneration, neurotrophin-based therapeutic  
367 applications have been confronted with a number of obstacles such as their nociceptive effects

368 and lack of strategy for localized signaling activation (Aloe et al. 2012; Mitre et al. 2017; Mahar  
369 and Cavalli 2018; Sung et al. 2019). OptoRaf and optoAKT aim to improve neurotrophin  
370 signaling outcomes by preferentially activating the neuroregenerative program and enabling  
371 spatiotemporal control. Our systems offer insights into the ERK and AKT subcircuits and  
372 delineate their differential roles downstream of neurotrophin activation, as evidenced by the  
373 distinct functional outcomes of Raf/MEK/ERK and AKT signaling in several aspects. First, ERK  
374 signaling promoted PC12 cell neurogenesis, which was not induced by AKT activation. Second,  
375 elevated ERK activity significantly increased dendritic complexity, while on the contrary, AKT  
376 activation led to decreased dendrite branching. Third, after injury, C4da neurons expressing  
377 optoRaf and optoAKT responded differently to intermitted light stimulation, suggesting that their  
378 strength and activation duration is differentially gauged during axon regeneration. These  
379 collectively suggest that, since Raf could be activated by membrane translocation as well as  
380 dimerization, CRY2 oligomerization could further lead to a more potent Raf. This multimodal  
381 activation mechanism may render that a threshold of optoRaf can be reached so that a saturated  
382 ERK activation could be achieved. On the other hand, AKT activation does not depend on  
383 dimerization and may display a graded response. As a result, optoAKT activates the AKT  
384 pathway in a dose-dependent manner and may not recapitulate the maximum activation of AKT.  
385 This work provides a proof-of-principle to use optogenetics to accelerate and navigate axon  
386 regeneration in mammalian injury models. Besides spatiotemporal control of the neurotrophic  
387 signaling, optoRaf and optoAKT allow for finetuning of the signaling activity with programmed  
388 light pattern during axon regeneration. Follow-up studies are warranted to determine how  
389 Raf/MEK/ERK and AKT subcircuits are involved in each process of nerve repair, including  
390 lesioned axon degeneration, regenerating axon initiation and extension, and the formation of new

391 synapses and remyelination in mammals. Understanding the machinery will, in turn, allow better  
392 utilization and development of the optogenetic systems. Although intact optogenetics in larger  
393 mammals is limited by the poor penetration depth of blue light (less than 1 mm), we are excited  
394 to witness the rapid progress in implantable, wireless  $\mu$ LED devices (Jeong et al. 2015; Park et al.  
395 2015b) and the integration of optogenetics with long-wavelength responsive nanomaterials such  
396 as the upconversion nanoparticles (He et al. 2015; Wu et al. 2016; Chen et al. 2018), both of  
397 which would facilitate precise delivery of light stimulation.

398

## 399 **Materials and Methods**

### 400 **Fly stocks**

401 *19-12-Gal4* (Xiang et al. 2010), *reop-Gal80* (Awasaki et al. 2008), *ppk-CD4-tdGFP* (Han et al.  
402 2011), and *ppk-Gal4* (Han et al. 2011) have been previously described. To generate the *UAS-*  
403 *optoRaf* and *UAS-optoAKT* stocks, the entire coding sequences were cloned into the pACU2  
404 vector, and the constructs were then injected (Rainbow Transgenic Flies, Inc). Randomly  
405 selected male and female larvae were used. Analyses were not performed blind to the conditions  
406 of the experiments. The experimental procedures have been approved by the Institutional  
407 Biosafety Committee (IBC) at the Children's Hospital of Philadelphia.

408

### 409 **Sensory axon lesion in *Drosophila***

410 Da neuron axon lesion and imaging in the PNS was performed in live fly larvae as previously  
411 described (Song et al. 2012; Stone et al. 2014; Song et al. 2015). VNC injury was performed as  
412 previously described (Song et al. 2012) (Li et al., submitted). In brief, A3 and A6 axon bundles  
413 in the VNC were ablated with a focused 930-nm two-photon laser and full degeneration around

414 the commissure junction was confirmed 24 h AI. At 48 h AI, axon regeneration of these two  
415 commissure segments were assayed independently of each other (Supplementary Fig. 3).

416

#### 417 **Quantitative analyses of sensory axon regeneration in flies**

418 Quantification was performed as previously described (Song et al. 2012; Song et al. 2015).  
419 Briefly, for axon regeneration in the PNS, we used “regeneration percentage”, which depicts the  
420 percent of regenerating axons among all the axons that were lesioned; “regeneration index”,  
421 which was calculated as an increase of “axon length”/“distance between the cell body and the  
422 axon converging point (DCAC)” (Supplementary Fig. 2A, 2B). An axon was defined as  
423 regenerating only when it obviously regenerated beyond the retracted axon stem, and this was  
424 independently assessed of the other parameters. The regeneration parameters from various  
425 genotypes were compared to that of the WT if not noted otherwise, and only those with  
426 significant differences were labeled with the asterisks. For VNC injury, the increased length of  
427 each axon regrowing beyond the lesion sites was measured and added together. To calculate the  
428 regeneration index, the sum was then divided by the distance between A4 and A5 axon bundles  
429 (Supplementary Fig. 3). Regeneration percentage was assessed independently of the regeneration  
430 index. A commissure segment was defined as regenerated only when at least one regenerating  
431 axon passed the midline of the commissure region or joined into other intact bundles  
432 (Supplementary Fig. 3).

433

#### 434 **Live imaging in flies**

435 Live imaging was performed as described (Emoto et al. 2006; Parrish et al. 2007). Embryos were  
436 collected for 2-24 hours on yeasted grape juice agar plates and were aged at 25 °C or room

437 temperature. At the appropriate time, a single larva was mounted in 90% glycerol under  
438 coverslips sealed with grease, imaged using a Zeiss LSM 880 microscope, and returned to grape  
439 juice agar plates between imaging sessions.

440

#### 441 **Behavioral assay**

442 The behavioral test was performed to detect functional recovery after VNC injury as described  
443 (Li et al., submitted). A7 and A8 C4da neuron axon bundles in the VNC, which correspond to  
444 the A7 and A8 body segments in the periphery, were injured with laser (Fig. 6A). Since C4da  
445 neurons are essential for thermonociception, such lesion results in impaired nociceptive response  
446 to noxious heat at body segments A7 and A8. We assessed larva nociceptive behavior in  
447 response to a 47 °C heat probe at 24 and 48 h AI. At each time point, the larva was subjected to  
448 three consecutive trials, separated by 15 seconds (s). In each trial, the heat probe was applied at  
449 the A7 and A8 body segments for 5 s. If the larva produced head rolling behavior for more than 2  
450 cycles, it would be scored as “1”, otherwise “0” (Fig. 6A). The scores of the three trials were  
451 combined and the total score at 24 h AI was used to determine whether A7 and A8 bundles were  
452 successfully ablated. A larva was defined as recovered only when its total score was below 1 at  
453 24 h AI but increased to 2 or 3 at 48 h AI. Those failed to exhibit such improvement at 48 h AI  
454 were defined as unrecovered. All the injured larvae exhibited normal nociceptive responses when  
455 the same heat probe was applied at the A4 or A5 body segment at 24 h AI.

456

#### 457 **Immunohistochemistry**

458 Third instar larvae or cultured neurons were fixed according to standard protocols. The following  
459 antibodies were used: rabbit anti-Phospho-p44/42 MAPK (Erk1/2) (Thr202/Tyr204) (4370,



460 1:100, Cell Signaling), rabbit anti-Phospho-*Drosophila* p70 S6 Kinase (Thr398) (9209S, 1:200,  
461 Cell Signaling) and fluorescence-conjugated secondary antibodies (1:1000, Jackson  
462 ImmunoResearch).

463

#### 464 **Cell culture and transfection**

465 HEK293T cells were cultured in DMEM medium supplemented with 10% FBS, and 1x  
466 Penicillin-Streptomycin solution (complete medium). Cultures were maintained in a standard  
467 humidified incubator at 37 °C with 5% CO<sub>2</sub>. For western blots, 800 ng of DNA were combined  
468 with 2.4 μL Turbofect in 80 μL of serum-free DMEM. The transfection mixtures were incubated  
469 at room temperature for 20 minutes prior to adding to cells cultured in 35 mm dishes with 2 mL  
470 complete medium. The transfection medium was replaced with 2 mL serum-free DMEM  
471 supplemented with 1× Penicillin-Streptomycin solution after 3 hours of transfection to starve  
472 cells overnight. PC12 cells were cultured in F12K medium supplemented with 15% horse serum,  
473 2.5% FBS, and 1× Penicillin-Streptomycin solution. (For PC12 neuritogenesis assays, 2400 ng  
474 of DNA were combined with 7.2 mL of Turbofect in 240 mL of serum-free F12K. The  
475 transfection medium was replaced with 2 mL complete medium after 3 hours of transfection to  
476 recover cells overnight.). Twenty-four hours after recovery in high-serum F12K medium [15%  
477 horse serum + 2.5% fetal bovine serum (FBS)], the cell culture was exchanged to a low-serum  
478 medium (1.5% horse serum + 0.25% FBS) to minimize the base-level ERK activation induced  
479 by serum.

480

#### 481 **Optogenetic stimulation for cell culture**

482 For Western blot analysis, transfected and serum-starved cells were illuminated for different time  
483 using a home-built blue LED light box emitting at  $0.5 \text{ mW/cm}^2$ . For PC12 cell neuritogenesis  
484 assay, PC12 cells were illuminated at  $0.2 \text{ mW/cm}^2$  for 24 h with the light box placed in the  
485 incubator.

486

### 487 **Optogenetic stimulation for fly**

488 The whole optogenetics setup is modified from previous work (Kaneko et al. 2017). Larvae were  
489 grown in regular brown food at  $25 \text{ }^\circ\text{C}$  in 12 h-12 h light-dark cycle. At 72 h AEL, early 3rd  
490 instar larvae were transferred from food, anesthetized with ether for axotomy. After recovery in  
491 regular grape juice agar plates, larvae were kept in the dark or under blue light stimulation  
492 thereafter. A 470 nm blue LED (LUXEON Rebel LED) was set over the grape-agar plate for  
493 stimulation. The LED was mounted on a 10 mm square coolbase and 50 mm square  $\times$  25mm  
494 high alpha heat sink and set under circular beam optic with integrated legs for parallel even light.  
495 The light pattern was programmed with BASIC Stamp 2.0 microcontroller and buckpuck DC  
496 driver (LUXEON, 700 mA, externally dimmable).

497 Local light stimulation was delivered by a 488 nm argon-ion laser using a Zeiss LSM 880  
498 microscope. At 24 h AI, larvae were anesthetized and C4da neurons were imaged with a  
499 confocal microscope. For lesioned axons that bifurcated and formed two branches, we focused  
500 the laser beam (at 15% laser power) on the ventral branch for 5 min. The larva was then returned  
501 to grape juice agar plates and imaged again at 48 h AI to assess the increased length of each  
502 branch.

503

### 504 **Live cell imaging**

505 For the light-induced membrane recruitment assay, BHK-21 cells were co-transfected with  
506 optoRaf or optoAKT. Fluorescence imaging of the transfected cells was carried out using a  
507 confocal microscope (Zeiss LSM 700). GFP fluorescence was excited by a 488-nm laser beam;  
508 mCherry fluorescence was excited by a 555-nm laser beam. Excitation beams were focused via a  
509 40× oil objective (Plan-Neofluar NA 1.30). Ten pulsed 488-nm and 555-nm excitation were  
510 applied for each membrane recruitment experiment. CRY2-CIBN binding induced by 488-nm  
511 light was monitored by membrane recruitment of CRY2-mCherry-Raf1 (for optoRaf) or CRY2-  
512 mCherry-AKT (for optoAKT) to the CIBN-CIBN-GFP-CaaX-anchored plasma membrane. The  
513 powers after the objective for 488-nm and 555-nm laser beam are approximately 40 μW and 75  
514 μW, respectively. Alternatively, an epi-illumination fluorescence microscope (Leica DMI8)  
515 equipped with a 100× objective (HCX PL FLUOTAR 100×/1.30 oil) and a light-emitting diode  
516 illuminator (SOLA SE II 365) was used for the CRY2-mCherry-Raf1 membrane translocation  
517 assay. Neurite outgrowth of PC12 cells was imaged using an epi-illumination fluorescence  
518 microscope (Leica DMI8) equipped with 10× (PLAN 10×/0.25) and 40× (HCXPL FL L 40×/0.6)  
519 objectives. Fluorescence from GFP was detected using the GFP filter cube (Leica, excitation  
520 filter 472/30, dichroic mirror 495, and emission filter 520/35); fluorescence from mCherry was  
521 detected using the Texas Red filter cube (Leica, excitation filter 560/40, dichroic mirror 595, and  
522 emission filter 645/75).

523

## 524 **Western Blot**

525 Cells were washed once with 1 mL cold DPBS and lysed with 100 μL cold lysis buffer (RIPA +  
526 protease/phosphatase cocktail). Lysates were centrifuged at 17,000 RCF, 4 °C for 10 minutes to  
527 pellet cell debris. Purified lysates were normalized using Bradford reagent. Normalized samples

528 were mixed with LDS buffer and loaded onto 10% or 12% polyacrylamide gels. SDS-PAGE was  
529 performed at room temperature with a cold water bath. Samples were transferred to PVDF  
530 membranes at 30 V 4 °C overnight or 80 V for 90 minutes. Membranes were blocked in 5%  
531 BSA/TBST for 1 hour at room temperature and probed with the primary and secondary  
532 antibodies according to company guidelines. Membranes were incubated with ECL substrate and  
533 imaged using a Bio-Rad ChemiDoc XRS chemiluminescence detector. Signal intensity analysis  
534 was performed by ImageJ.

535

### 536 **Statistical Analysis**

537 No statistical methods were used to pre-determine sample sizes but our sample sizes are similar  
538 to those reported in previous publications (Song et al. 2012; Song et al. 2015), and the statistical  
539 analyses were done afterward without interim data analysis. Data distribution was assumed to be  
540 normal but this was not formally tested. All data were collected and processed randomly. Each  
541 experiment was successfully reproduced at least three times and was performed on different days.  
542 The values of “*N*” (sample size) are provided in the figure legends. Data are expressed as mean  
543  $\pm$  SEM in bar graphs, if not mentioned otherwise. No data points were excluded. Two-tailed  
544 unpaired Student’s t-test was performed for comparison between two groups of samples. One-  
545 way ANOVA followed by multiple comparison test was performed for comparisons among three  
546 or more groups of samples. Two-way ANOVA followed by multiple comparison test was  
547 performed for comparisons between two or more curves. Fisher’s exact test was used to compare  
548 the percentage. Statistical significance was assigned, \* $P < 0.05$ , \*\* $P < 0.01$ , \*\*\* $P < 0.001$ .

549

### 550 **Acknowledgments**

551 The plasmid of FOXO3-EGFP was a gift from Prof. Anne Brunet at Stanford University. This  
552 work was supported by NIH grants 1R01NS107392 (Y.S.) and 1R01GM132438 (K.Z.).

553

#### 554 **Author Contributions**

555 Y.S., K.Z. and Q.W. conceived the experimental design. Q.W., H.F., F.L., S.S.S, and V.V.K.  
556 conducted the experiments. Q. W. and H. F. analyzed the data. Q.W., H.F., Y.S., and K.Z.  
557 prepared the manuscript and figures.

558

#### 559 **Conflict of interest**

560 The authors declare no conflict of interest.

561

#### 562 **References**

563 Aloe L, Rocco ML, Bianchi P, Manni L. 2012. Nerve growth factor: from the early discoveries  
564 to the potential clinical use. *J Transl Med* **10**.

565 Awasaki T, Lai SL, Ito K, Lee T. 2008. Organization and postembryonic development of glial  
566 cells in the adult central brain of *Drosophila*. *J Neurosci* **28**: 13742-13753.

567 Bibel M, Barde YA. 2000. Neurotrophins: key regulators of cell fate and cell shape in the  
568 vertebrate nervous system. *Genes Dev* **14**: 2919-2937.

569 Cervellini I, Galino J, Zhu N, Allen S, Birchmeier C, Bennett DL. 2018. Sustained MAPK/ERK  
570 Activation in Adult Schwann Cells Impairs Nerve Repair. *J Neurosci* **38**: 679-690.

571 Chao MV. 2003. Neurotrophins and their receptors: A convergence point for many signalling  
572 pathways. *Nature Reviews Neuroscience* **4**: 299-309.

- 573 Chen S, Weitemier AZ, Zeng X, He L, Wang X, Tao Y, Huang AJY, Hashimoto Y, Kano M,  
574 Iwasaki H et al. 2018. Near-infrared deep brain stimulation via upconversion  
575 nanoparticle-mediated optogenetics. *Science* **359**: 679-684.
- 576 Cheng PL, Song AH, Wong YH, Wang S, Zhang X, Poo MM. 2011. Self-amplifying autocrine  
577 actions of BDNF in axon development. *Proc Natl Acad Sci U S A* **108**: 18430-18435.
- 578 Cho HJ, Kim JK, Park HC, Kim JK, Kim DS, Ha SO, Hong HS. 1998. Changes in brain-derived  
579 neurotrophic factor immunoreactivity in rat dorsal root ganglia, spinal cord, and gracile  
580 nuclei following cut or crush injuries. *Exp Neurol* **154**: 224-230.
- 581 Dagliyan O, Hahn KM. 2019. Controlling protein conformation with light. *Curr Opin Struct Biol*  
582 **57**: 17-22.
- 583 Dine E, Gil AA, Uribe G, Brangwynne CP, Toettcher JE. 2018. Protein Phase Separation  
584 Provides Long-Term Memory of Transient Spatial Stimuli. *Cell Syst* **6**: 655-663.
- 585 Emoto K, Parrish JZ, Jan LY, Jan YN. 2006. The tumour suppressor Hippo acts with the NDR  
586 kinases in dendritic tiling and maintenance. *Nature* **443**: 210-213.
- 587 Fang H, Liu C, Yang M, Li H, Zhang F, Zhang W, Zhang J. 2017. Neurotrophic factor and Trk  
588 signaling mechanisms underlying the promotion of motor recovery after acute spinal cord  
589 injury in rats. *Exp Ther Med* **14**: 652-656.
- 590 Fukuoka T, Kondo E, Dai Y, Hashimoto N, Noguchi K. 2001. Brain-derived neurotrophic factor  
591 increases in the uninjured dorsal root ganglion neurons in selective spinal nerve ligation  
592 model. *J Neurosci* **21**: 4891-4900.
- 593 Gao FB, Brenman JE, Jan LY, Jan YN. 1999. Genes regulating dendritic outgrowth, branching,  
594 and routing in *Drosophila*. *Genes & development* **13**: 2549-2561.

- 595 Goglia AG, Toettcher JE. 2019. A bright future: optogenetics to dissect the spatiotemporal  
596 control of cell behavior. *Curr Opin Chem Biol* **48**: 106-113.
- 597 Grueber WB, Jan LY, Jan YN. 2002. Tiling of the Drosophila epidermis by multidendritic  
598 sensory neurons. *Development* **129**: 2867-2878.
- 599 Guo X, Snider WD, Chen B. 2016. GSK3beta regulates AKT-induced central nervous system  
600 axon regeneration via an eIF2Bepsilon-dependent, mTORC1-independent pathway. *Elife*  
601 **5**: e11903.
- 602 Han C, Jan LY, Jan YN. 2011. Enhancer-driven membrane markers for analysis of  
603 nonautonomous mechanisms reveal neuron-glia interactions in Drosophila. *Proc Natl*  
604 *Acad Sci U S A* **108**: 9673-9678.
- 605 Hayashi M, Ueyama T, Nemoto K, Tamaki T, Senba E. 2000. Sequential mRNA expression for  
606 immediate early genes, cytokines, and neurotrophins in spinal cord injury. *J Neurotrauma*  
607 **17**: 203-218.
- 608 He L, Zhang YW, Ma GL, Tan P, Li ZJ, Zang SB, Wu X, Jing J, Fang SH, Zhou LJ et al. 2015.  
609 Near-infrared photoactivatable control of Ca<sup>2+</sup> signaling and optogenetic  
610 immunomodulation. *Elife* **4**.
- 611 He Z, Jin Y. 2016. Intrinsic Control of Axon Regeneration. *Neuron* **90**: 437-451.
- 612 Huang EJ, Reichardt LF. 2001. Neurotrophins: roles in neuronal development and function.  
613 *Annu Rev Neurosci* **24**: 677-736.
- 614 Huang H, Liu H, Yan R, Hu M. 2017. PI3K/Akt and ERK/MAPK Signaling Promote Different  
615 Aspects of Neuron Survival and Axonal Regrowth Following Rat Facial Nerve Axotomy.  
616 *Neurochem Res* **42**: 3515-3524.

- 617 Hyung S, Lee SR, Kim YJ, Bang S, Tahk D, Park JC, Suh JF, Jeon NL. 2019. Optogenetic  
618 neuronal stimulation promotes axon outgrowth and myelination of motor neurons in a  
619 three-dimensional motor neuron-Schwann cell coculture model on a microfluidic biochip.  
620 *Biotechnol Bioeng* **116**: 2425-2438.
- 621 Jeong JW, McCall JG, Shin G, Zhang Y, Al-Hasani R, Kim M, Li S, Sim JY, Jang KI, Shi Y et  
622 al. 2015. Wireless Optofluidic Systems for Programmable In Vivo Pharmacology and  
623 Optogenetics. *Cell* **162**: 662-674.
- 624 Johnson HE, Toettcher JE. 2018. Illuminating developmental biology with cellular optogenetics.  
625 *Curr Opin Biotechnol* **52**: 42-48.
- 626 Joo W, Hippenmeyer S, Luo L. 2014. Neurodevelopment. Dendrite morphogenesis depends on  
627 relative levels of NT-3/TrkC signaling. *Science* **346**: 626-629.
- 628 Kaneko T, Macara AM, Li R, Hu Y, Iwasaki K, Dunning Z, Firestone E, Horvatic S, Guntur A,  
629 Shafer OT et al. 2017. Serotonergic Modulation Enables Pathway-Specific Plasticity in a  
630 Developing Sensory Circuit in Drosophila. *Neuron* **95**: 623-638.
- 631 Kennedy MJ, Hughes RM, Peteya LA, Schwartz JW, Ehlers MD, Tucker CL. 2010. Rapid blue-  
632 light-mediated induction of protein interactions in living cells. *Nat Methods* **7**: 973-975.
- 633 Khamo JS, Krishnamurthy VV, Chen Q, Diao J, Zhang K. 2019. Optogenetic Delineation of  
634 Receptor Tyrosine Kinase Subcircuits in PC12 Cell Differentiation. *Cell Chem Biol* **26**:  
635 400-410
- 636 Khamo JS, Krishnamurthy VV, Sharum SR, Mondal P, Zhang K. 2017. Applications of  
637 Optobiology in Intact Cells and Multicellular Organisms. *J Mol Biol* **429**: 2999-3017.



- 638 Krishnamurthy VV, Khamo JS, Mei W, Turgeon AJ, Ashraf HM, Mondal P, Patel DB, Risner N,  
639 Cho EE, Yang J et al. 2016. Reversible optogenetic control of kinase activity during  
640 differentiation and embryonic development. *Development* **143**: 4085-4094.
- 641 Kuo CT, Jan LY, Jan YN. 2005. Dendrite-specific remodeling of Drosophila sensory neurons  
642 requires matrix metalloproteases, ubiquitin-proteasome, and ecdysone signaling.  
643 *Proceedings of the National Academy of Sciences of the United States of America* **102**:  
644 15230-15235.
- 645 Kuo CT, Zhu S, Younger S, Jan LY, Jan YN. 2006. Identification of E2/E3 ubiquitinating  
646 enzymes and caspase activity regulating Drosophila sensory neuron dendrite pruning.  
647 *Neuron* **51**: 283-290.
- 648 Kyung T, Lee S, Kim JE, Cho T, Park H, Jeong YM, Kim D, Shin A, Kim S, Baek J et al. 2015.  
649 Optogenetic control of endogenous Ca(2+) channels in vivo. *Nat Biotechnol* **33**: 1092-  
650 1096.
- 651 Leopold AV, Chernov KG, Verkhusha VV. 2018. Optogenetically controlled protein kinases for  
652 regulation of cellular signaling. *Chem Soc Rev*.
- 653 Liu BP, Cafferty WB, Budel SO, Strittmatter SM. 2006. Extracellular regulators of axonal  
654 growth in the adult central nervous system. *Philos Trans R Soc Lond B Biol Sci* **361**:  
655 1593-1610.
- 656 Liu K, Tedeschi A, Park KK, He Z. 2011. Neuronal intrinsic mechanisms of axon regeneration.  
657 *Annu Rev Neurosci* **34**: 131-152.
- 658 Lizcano JM, Alrubaie S, Kieloch A, Deak M, Leervers SJ, Alessi DR. 2003. Insulin-induced  
659 Drosophila S6 kinase activation requires phosphoinositide 3-kinase and protein kinase B.  
660 *Biochem J* **374**: 297-306.

- 661 Lu Y, Belin S, He Z. 2014. Signaling regulations of neuronal regenerative ability. *Curr Opin*  
662 *Neurobiol* **27**: 135-142.
- 663 Ma G, Liu J, Ke Y, Liu X, Li M, Wang F, Han G, Huang Y, Wang Y, Zhou Y. 2018.  
664 Optogenetic Control of Voltage-Gated Calcium Channels. *Angew Chem Int Ed Engl* **57**:  
665 7019-7022.
- 666 Mahar M, Cavalli V. 2018. Intrinsic mechanisms of neuronal axon regeneration. *Nat Rev*  
667 *Neurosci* **19**: 323-337.
- 668 Markus A, Zhong J, Snider WD. 2002. Raf and akt mediate distinct aspects of sensory axon  
669 growth. *Neuron* **35**: 65-76.
- 670 Marshall CJ. 1995. Specificity of receptor tyrosine kinase signaling: transient versus sustained  
671 extracellular signal-regulated kinase activation. *Cell* **80**: 179-185.
- 672 Miao L, Yang L, Huang H, Liang F, Ling C, Hu Y. 2016. mTORC1 is necessary but mTORC2  
673 and GSK3beta are inhibitory for AKT3-induced axon regeneration in the central nervous  
674 system. *Elife* **5**: e14908.
- 675 Miron M, Lasko P, Sonenberg N. 2003. Signaling from Akt to FRAP/TOR targets both 4E-BP  
676 and S6K in *Drosophila melanogaster*. *Mol Cell Biol* **23**: 9117-9126.
- 677 Mitre M, Mariga A, Chao MV. 2017. Neurotrophin signalling: novel insights into mechanisms  
678 and pathophysiology. *Clin Sci* **131**: 13-23.
- 679 Motta-Mena LB, Reade A, Mallory MJ, Glantz S, Weiner OD, Lynch KW, Gardner KH. 2014.  
680 An optogenetic gene expression system with rapid activation and deactivation kinetics.  
681 *Nat Chem Biol* **10**: 196-202.

- 682 O'Donovan KJ, Ma K, Guo H, Wang C, Sun F, Han SB, Kim H, Wong JK, Charron J, Zou H et  
683 al. 2014. B-RAF kinase drives developmental axon growth and promotes axon  
684 regeneration in the injured mature CNS. *J Exp Med* **211**: 801-814.
- 685 Ong Q, Guo S, Duan L, Zhang K, Collier EA, Cui B. 2016. The Timing of Raf/ERK and AKT  
686 Activation in Protecting PC12 Cells against Oxidative Stress. *PLoS One* **11**: e0153487.
- 687 Park KK, Liu K, Hu Y, Smith PD, Wang C, Cai B, Xu B, Connolly L, Kramvis I, Sahin M et al.  
688 2008. Promoting axon regeneration in the adult CNS by modulation of the PTEN/mTOR  
689 pathway. *Science* **322**: 963-966.
- 690 Park S, Koppes RA, Froriep UP, Jia X, Achyuta AK, McLaughlin BL, Anikeeva P. 2015a.  
691 Optogenetic control of nerve growth. *Sci Rep* **5**: 9669.
- 692 Park SI, Brenner DS, Shin G, Morgan CD, Copits BA, Chung HU, Pullen MY, Noh KN,  
693 Davidson S, Oh SJ et al. 2015b. Soft, stretchable, fully implantable miniaturized  
694 optoelectronic systems for wireless optogenetics. *Nat Biotechnol* **33**: 1280-1286.
- 695 Parrish JZ, Emoto K, Kim MD, Jan YN. 2007. Mechanisms that regulate establishment,  
696 maintenance, and remodeling of dendritic fields. *Annu Rev Neurosci* **30**: 399-423.
- 697 Poyhonen S, Er S, Domanskyi A, Airavaara M. 2019. Effects of Neurotrophic Factors in Glial  
698 Cells in the Central Nervous System: Expression and Properties in Neurodegeneration  
699 and Injury. *Front Physiol* **10**: 486.
- 700 Ramer MS, Priestley JV, McMahon SB. 2000. Functional regeneration of sensory axons into the  
701 adult spinal cord. *Nature* **403**: 312-316.
- 702 Rose CR, Blum R, Pichler B, Lepier A, Kafitz KW, Konnerth A. 2003. Truncated TrkB-T1  
703 mediates neurotrophin-evoked calcium signalling in glia cells. *Nature* **426**: 74-78.

- 704 Schwab ME, Strittmatter SM. 2014. Nogo limits neural plasticity and recovery from injury. *Curr*  
705 *Opin Neurobiol* **27**: 53-60.
- 706 Shin Y, Berry J, Pannucci N, Haataja MP, Toettcher JE, Brangwynne CP. 2017. Spatiotemporal  
707 Control of Intracellular Phase Transitions Using Light-Activated optoDroplets. *Cell* **168**:  
708 159-171 e114.
- 709 Silver J, Miller JH. 2004. Regeneration beyond the glial scar. *Nat Rev Neurosci* **5**: 146-156.
- 710 Song Y, Ori-McKenney KM, Zheng Y, Han C, Jan LY, Jan YN. 2012. Regeneration of  
711 *Drosophila* sensory neuron axons and dendrites is regulated by the Akt pathway  
712 involving Pten and microRNA bantam. *Genes Dev* **26**: 1612-1625.
- 713 Song Y, Sretavan D, Salegio EA, Berg J, Huang X, Cheng T, Xiong X, Meltzer S, Han C,  
714 Nguyen TT et al. 2015. Regulation of axon regeneration by the RNA repair and splicing  
715 pathway. *Nat Neurosci* **18**: 817-825.
- 716 Stone MC, Albertson RM, Chen L, Rolls MM. 2014. Dendrite injury triggers DLK-independent  
717 regeneration. *Cell reports* **6**: 247-253.
- 718 Sugimura K, Yamamoto M, Niwa R, Satoh D, Goto S, Taniguchi M, Hayashi S, Uemura T. 2003.  
719 Distinct developmental modes and lesion-induced reactions of dendrites of two classes of  
720 *Drosophila* sensory neurons. *The Journal of neuroscience : the official journal of the*  
721 *Society for Neuroscience* **23**: 3752-3760.
- 722 Sun F, He Z. 2010. Neuronal intrinsic barriers for axon regeneration in the adult CNS. *Curr Opin*  
723 *Neurobiol* **20**: 510-518.
- 724 Sun L, Shay J, McLoed M, Roodhouse K, Chung SH, Clark CM, Pirri JK, Alkema MJ, Gabel  
725 CV. 2014. Neuronal Regeneration in *C. elegans* Requires Subcellular Calcium Release by

- 726 Ryanodine Receptor Channels and Can Be Enhanced by Optogenetic Stimulation.  
727 *Journal of Neuroscience* **34**: 15947-15956.
- 728 Sung KJ, Yang WL, Wu CB. 2019. Uncoupling neurotrophic function from nociception of nerve  
729 growth factor: what can be learned from a rare human disease? *Neural Regen Res* **14**:  
730 570-573.
- 731 Wang W, Wildes CP, Pattarabanjird T, Sanchez MI, Glober GF, Matthews GA, Tye KM, Ting  
732 AY. 2017. A light- and calcium-gated transcription factor for imaging and manipulating  
733 activated neurons. *Nat Biotechnol* **35**: 864-871.
- 734 Watson FL, Heerssen HM, Bhattacharyya A, Klesse L, Lin MZ, Segal RA. 2001. Neurotrophins  
735 use the Erk5 pathway to mediate a retrograde survival response. *Nat Neurosci* **4**: 981-988.
- 736 Williams DW, Kondo S, Krzyzanowska A, Hiromi Y, Truman JW. 2006. Local caspase activity  
737 directs engulfment of dendrites during pruning. *Nature neuroscience* **9**: 1234-1236.
- 738 Williams DW, Truman JW. 2005. Cellular mechanisms of dendrite pruning in *Drosophila*:  
739 insights from in vivo time-lapse of remodeling dendritic arborizing sensory neurons.  
740 *Development* **132**: 3631-3642.
- 741 Wu X, Zhang Y, Takle K, Bilsel O, Li Z, Lee H, Zhang Z, Li D, Fan W, Duan C et al. 2016.  
742 Dye-Sensitized Core/Active Shell Upconversion Nanoparticles for Optogenetics and  
743 Bioimaging Applications. *ACS Nano* **10**: 1060-1066.
- 744 Wu YI, Frey D, Lungu OI, Jaehrig A, Schlichting I, Kuhlman B, Hahn KM. 2009. A genetically  
745 encoded photoactivatable Rac controls the motility of living cells. *Nature* **461**: 104-108.
- 746 Xiang Y, Yuan Q, Vogt N, Looger LL, Jan LY, Jan YN. 2010. Light-avoidance-mediating  
747 photoreceptors tile the *Drosophila* larval body wall. *Nature* **468**: 921-926.

- 748 Xiao JH, Wong AW, Willingham MM, van den Buuse M, Kilpatrick TJ, Murray SS. 2010.  
749 Brain-Derived Neurotrophic Factor Promotes Central Nervous System Myelination via a  
750 Direct Effect upon Oligodendrocytes. *Neurosignals* **18**: 186-202.
- 751 Xiao Y, Tian W, Lopez-Schier H. 2015. Optogenetic stimulation of neuronal repair. *Curr Biol* **25**:  
752 R1068-1069.
- 753 Yiu G, He Z. 2006. Glial inhibition of CNS axon regeneration. *Nat Rev Neurosci* **7**: 617-627.
- 754 Zhang K, Cui B. 2015. Optogenetic control of intracellular signaling pathways. *Trends*  
755 *Biotechnol* **33**: 92-100.
- 756 Zhang K, Duan L, Ong Q, Lin Z, Varman PM, Sung K, Cui B. 2014. Light-mediated kinetic  
757 control reveals the temporal effect of the Raf/MEK/ERK pathway in PC12 cell neurite  
758 outgrowth. *PLoS One* **9**: e92917.
- 759 Zhao EM, Suek N, Wilson MZ, Dine E, Pannucci NL, Gitai Z, Avalos JL, Toettcher JE. 2019.  
760 Light-based control of metabolic flux through assembly of synthetic organelles. *Nat*  
761 *Chem Biol* **15**: 589-597.
- 762 Zhao EM, Zhang Y, Mehl J, Park H, Lalwani MA, Toettcher JE, Avalos JL. 2018. Optogenetic  
763 regulation of engineered cellular metabolism for microbial chemical production. *Nature*  
764 **555**: 683-687.
- 765 Zhou XX, Fan LZ, Li P, Shen K, Lin MZ. 2017. Optical control of cell signaling by single-chain  
766 photoswitchable kinases. *Science* **355**: 836-842.

767

768

769 **Figures**

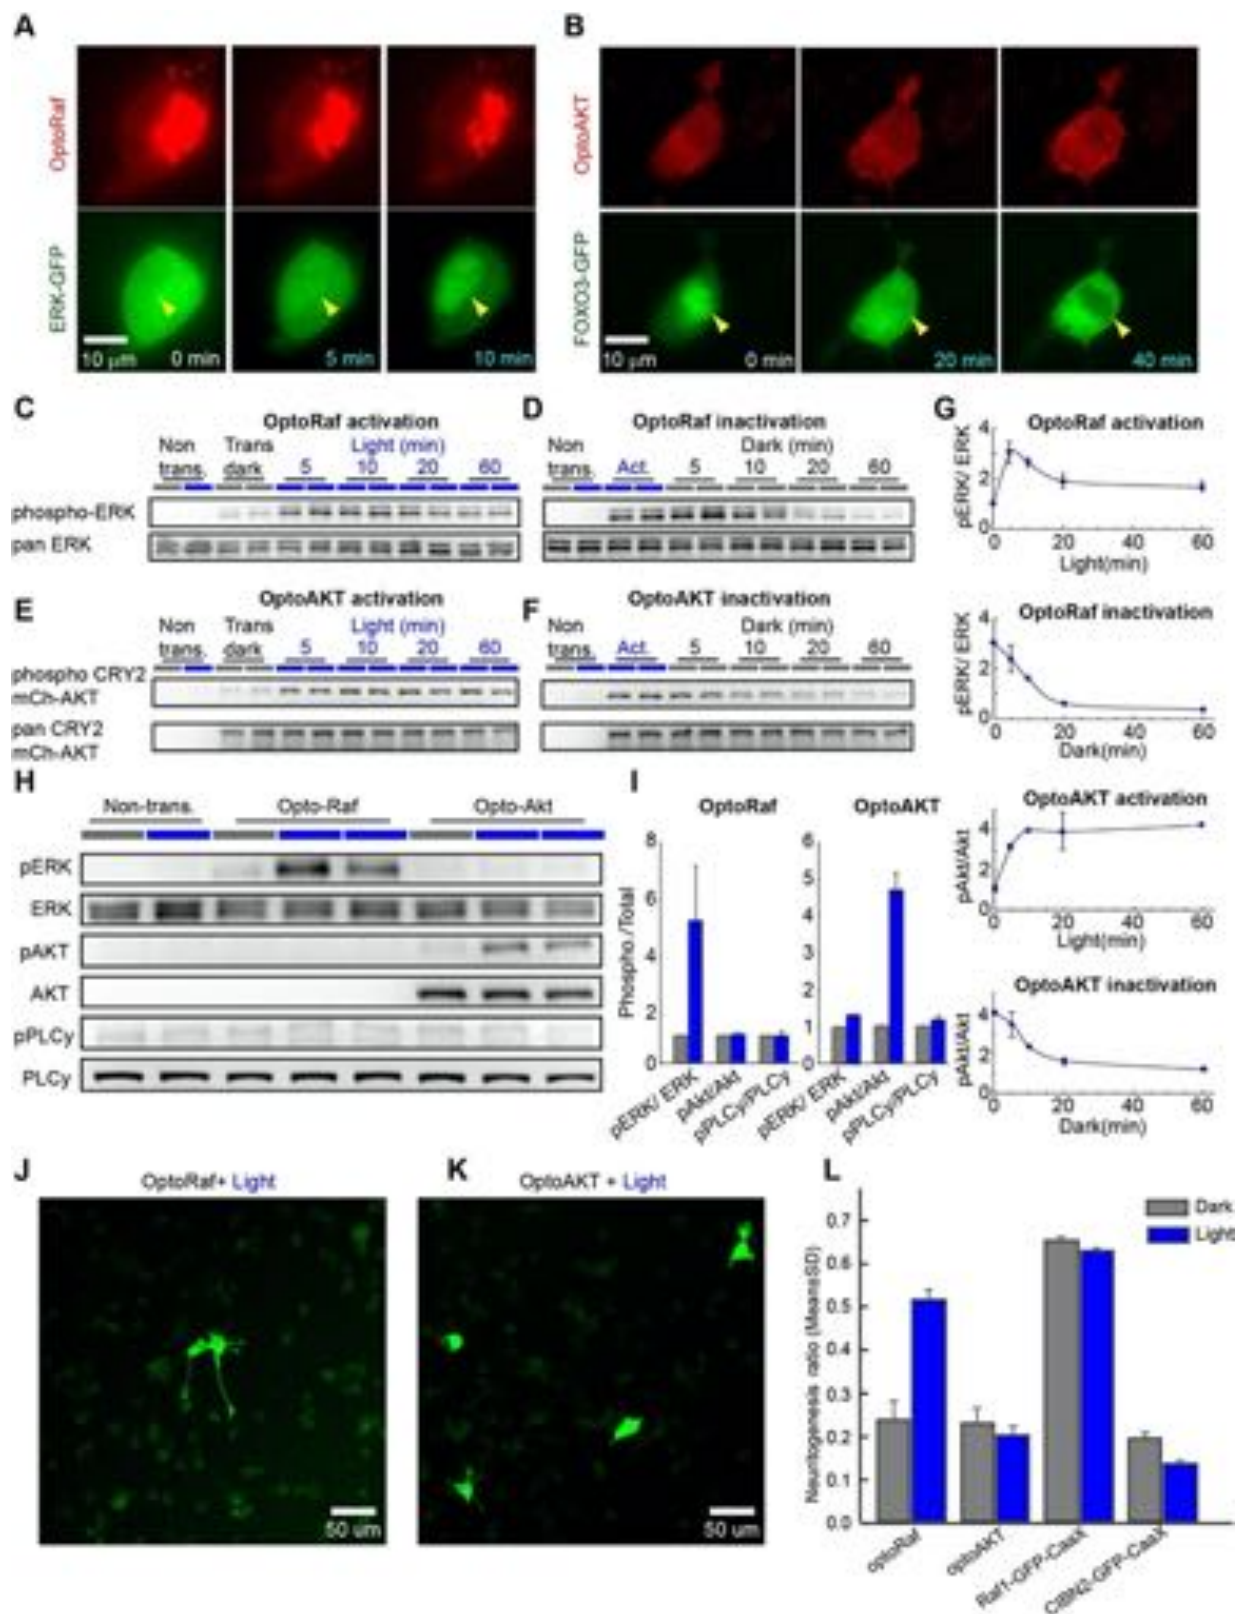

770



771 **Figure 1. OptoRaf and optoAKT specifically activate the ERK and AKT subcircuits,**  
772 **respectively.** (A) Activation of optoRaf benchmarked with ERK-GFP nuclear translocation. (B)  
773 Activation of optoAKT benchmarked with FOXO3-EGFP nuclear export. Scale bars = 10  $\mu\text{m}$ . (C)  
774 Western blot analysis of the pERK and ERK activities in response to time-stamped activation of  
775 optoRaf. Blue light ( $0.5 \text{ mW/cm}^2$ ) was applied for 5, 10, 20, and 60 min to HEK293T cells  
776 transfected with optoRaf. Non-transfected cells or optoRaf-transfected cells (dark) were used as  
777 negative controls. (D) Inactivation of the pERK activity after blue light was shut off. (E) Western  
778 blot analysis of the pAKT and AKT activities in response to time-stamped activation of  
779 optoAKT. Cells were treated with identical illumination scheme in (C). (F) Inactivation of the  
780 pAKT activity after blue light was shut off. (G) Quantification of the pERK activity (top two  
781 panels) and pAKT (bottom two panels) upon optoRaf and optoAKT activation, respectively.  
782 Both optoRaf and optoAKT show rapid (less than 5 min) and reversible activation patterns ( $N =$   
783 2). (H) OptoRaf and optoAKT do not show cross activity at the level of ERK and AKT. Neither  
784 optoRaf nor optoAKT can cause PLC $\gamma$  phosphorylation. Cells were exposed to blue light ( $0.5$   
785  $\text{mW/cm}^2$ ) for 10 min before lysis. (I) Quantification of the phosphorylated protein level in (H) ( $N$   
786 = 2). (J, K) PC12 cells transfected with either optoRaf (J) or optoAKT (K) were treated by blue  
787 light for 24 h ( $0.2 \text{ mW/cm}^2$ ). Scale bars = 50  $\mu\text{m}$ . (I) Quantification of the neuritogenesis ratio of  
788 PC12 cells transfected with optoRaf or optoAKT. A membrane-targeted Raf (Raf1-GFP-CaaX)  
789 causes constitutive neuritogenesis independent of light treatment, whereas the no-Raf (CIBN2-  
790 GFP-CaaX) control does not increase the neuritogenesis ratio under light or dark treatment.

791

792



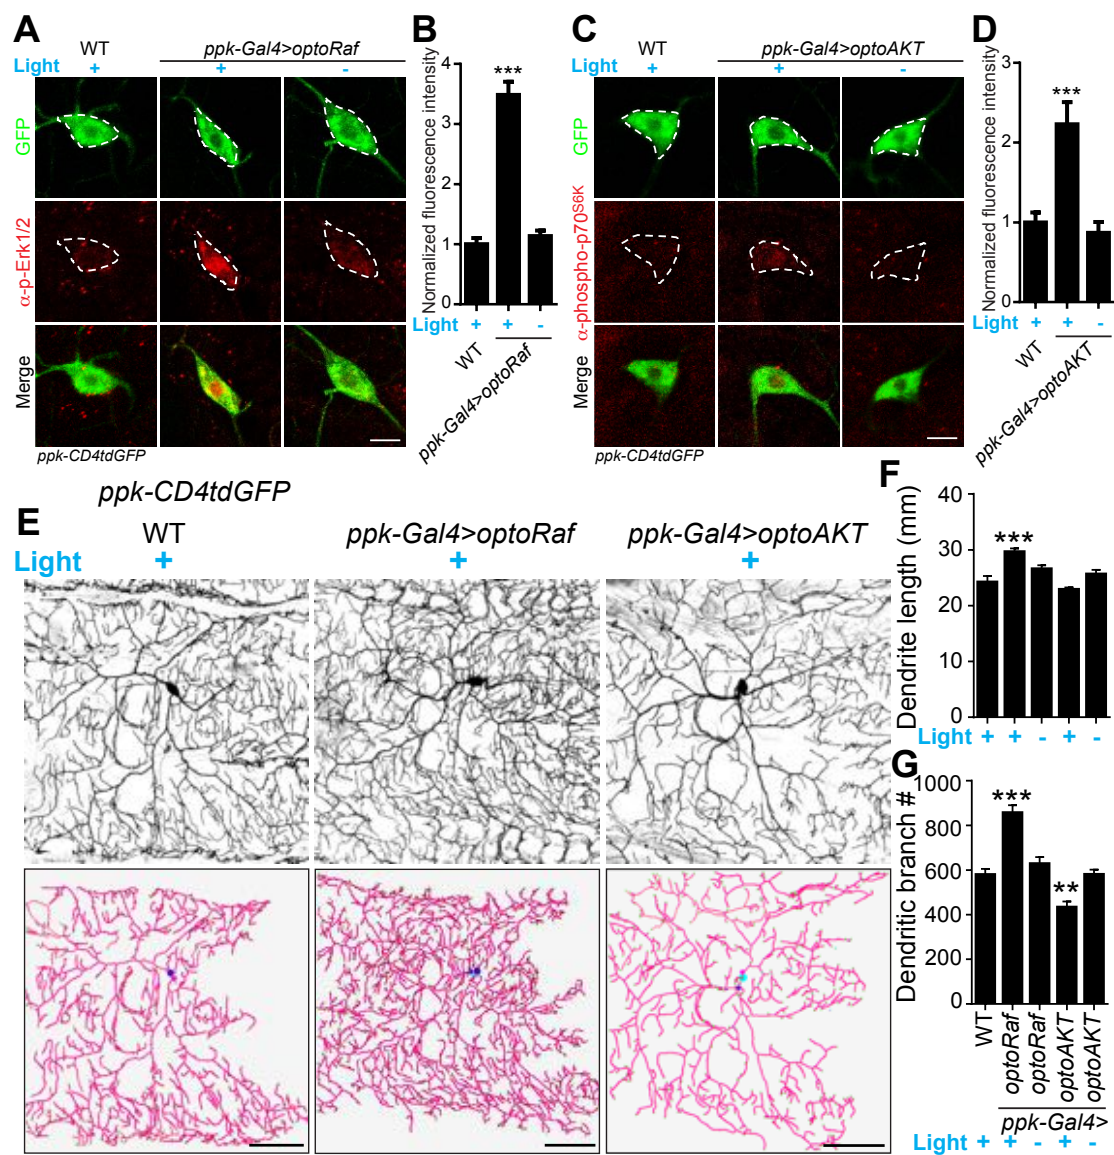

794 **Figure 2. Activation of optoRaf but not optoAKT increases C4da neuron dendrite**  
795 **complexity.** (A, B) Blue light stimulation activates optoRaf in flies *in vivo*. (A) The body walls  
796 from WT and optoRaf expressing larvae were dissected and stained for pERK1/2. After 5-min  
797 continuous light stimulation, the relative intensity of pERK is significantly increased in the  
798 optoRaf-expressing C4da neurons (labeled by *ppk-CD4tdGFP*). C4da neuron cell bodies are  
799 outlined by dashed white lines. Scale Bar = 10  $\mu$ m. (B) Qualification of pERK fluorescence  
800 intensity in (A). The intensity of pERK in optoRaf expressing larvae was normalized to that of  
801 WT.  $N = 18$  neurons. (C, D) The 5-min light stimulation is sufficient to activate optoAKT *in vivo*.  
802 (C) The larval body walls from WT and optoAKT expressing larvae were dissected and stained  
803 for phospho-p70<sup>S6K</sup>, a downstream component of the AKT pathway. Light stimulation increases  
804 phospho-p70<sup>S6K</sup> signal intensity in C4da neurons expressing optoAKT. C4da neuron cell bodies  
805 are outlined by dashed white lines. Scale Bar = 10  $\mu$ m. (D) Qualification of phospho-p70<sup>S6K</sup>  
806 fluorescence intensity in (C). The intensity of phospho-p70<sup>S6K</sup> in optoAKT expressing larvae was  
807 normalized to that of WT. WT (light)  $N = 17$ , *optoAKT* (light)  $N = 19$ , *optoAKT* (dark)  $N = 18$   
808 neurons. (E-G) Activation of Raf/MEK/ERK but not AKT signaling by 72 hours' light  
809 stimulation increases dendrite outgrowth and branching in C4da neurons. (E) Representative  
810 images of C4da neurons from WT, optoRaf and optoAKT expressing larvae with 72 hours' light  
811 stimulation and the unstimulated controls. Neurons were reconstructed with Neurostudio. Scale  
812 bar = 50  $\mu$ m. (F) Quantification of total dendrite length of C4da neurons. (G) Qualification of  
813 dendritic branch number. WT (light)  $N = 21$ , *optoRaf* (light)  $N = 20$ , *optoRaf* (dark)  $N = 21$ ,  
814 *optoAKT* (light)  $N = 21$ , *optoAKT* (dark)  $N = 20$  neurons. All data are mean  $\pm$  SEM. The data  
815 were analyzed by one-way ANOVA followed by Dunnett's multiple comparisons test,  $**P <$   
816  $0.01$ ,  $***P < 0.001$ .

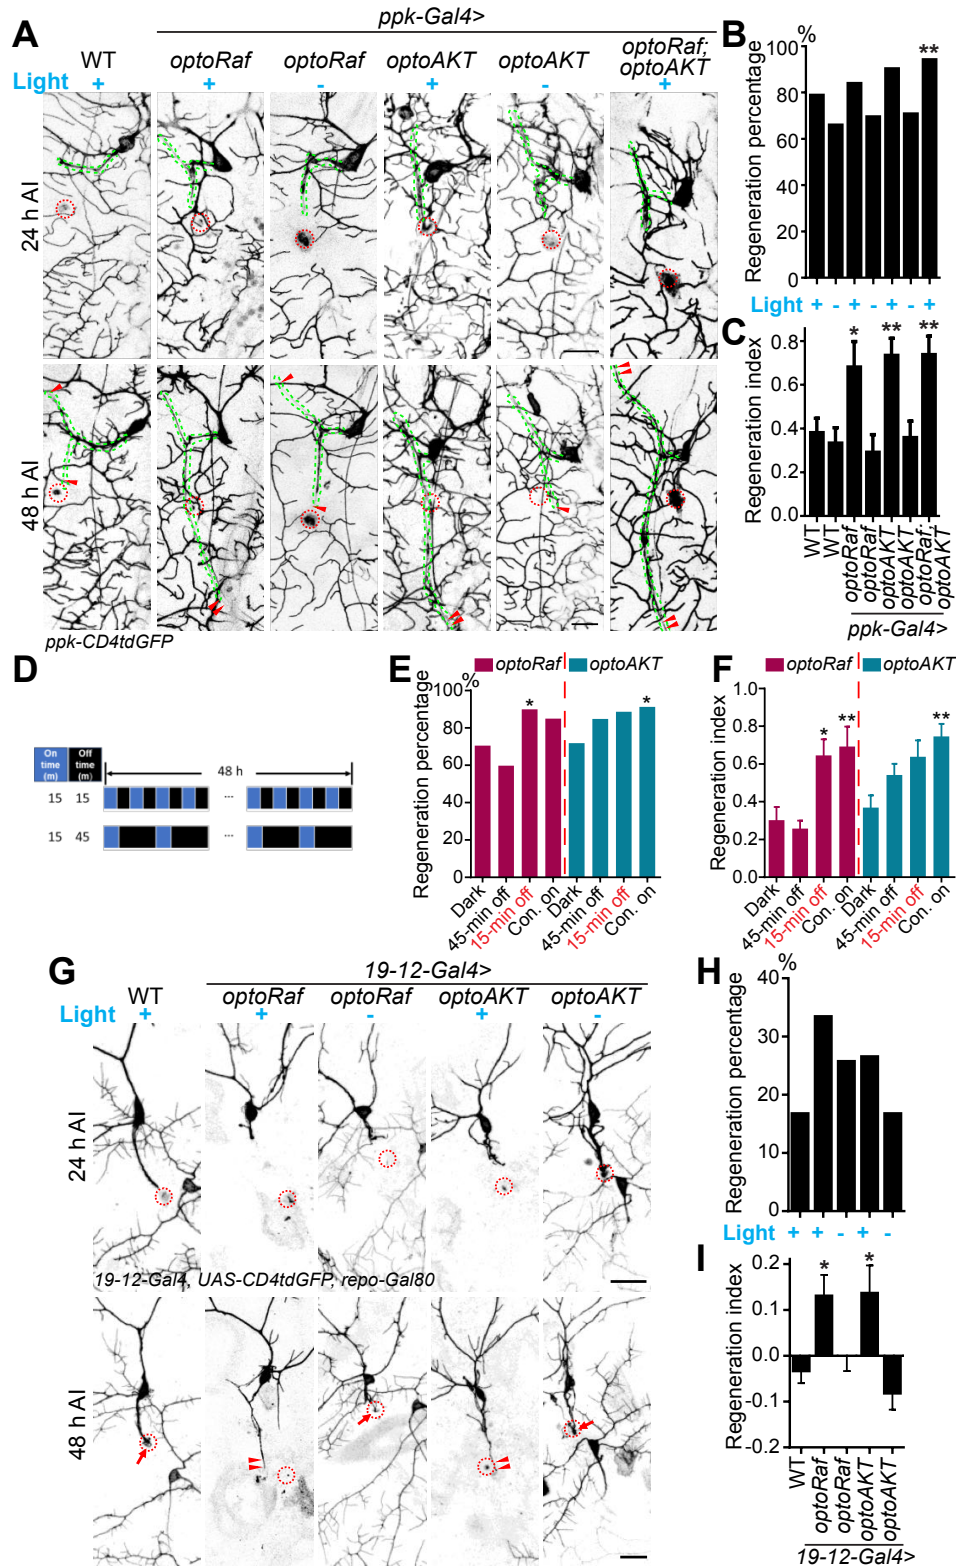

817

818

819 **Figure 3 Light-stimulated optoRaf or optoAKT enhances axon regeneration in the PNS.**

820 (A-C) Compared to WT, C4da neurons expressing optoRaf or optoAKT show significantly  
821 increased axon regeneration in response to blue light. No enhancement was observed in the  
822 unstimulated controls. (A) C4da neuron axons were severed and their regeneration was assayed  
823 at 48 h AI. The injury site is marked by the dashed circle and regenerating axons are marked by  
824 arrowheads. Axons are outlined with dashed green lines. Scale bar = 20  $\mu$ m. (B) The  
825 regeneration percentage of light-stimulated transgenic groups is not significantly higher than WT.  
826 Fisher's exact test,  $P = 0.2199$ ,  $P = 0.6026$ ,  $P = 0.8829$ ,  $P = 0.1445$ ,  $P = 0.7886$ ,  $P = 0.0025$ . (C)  
827 Qualification of C4da neuron axon regeneration by the regeneration index. WT (light)  $N = 33$ ,  
828 WT (dark)  $N = 41$ , *optoRaf* (light)  $N = 31$ , *optoRaf* (dark)  $N = 36$ , *optoAKT* (light)  $N = 52$ ,  
829 *optoAKT* (dark)  $N = 41$ , *optoRaf* + *optoAKT* (light)  $N=51$  neurons. Data are mean  $\pm$  SEM,  
830 analyzed by one-way ANOVA followed by Dunnett's multiple comparisons test. (D-F) After  
831 injury, larvae were subjected to programmed light and dark cycles for a total of 48 h. The  
832 intermittent light stimulation promotes axon regrowth in optoRaf expressing larvae similar to  
833 constant light when the off-time is 15 min. (D) The intermittent patterns of the light stimulus. (E)  
834 Compared to larvae incubated in dark, light stimulation is capable of increasing the percentage of  
835 regenerated axons. Fisher's exact test,  $P = 0.3357$ ,  $P = 0.0422$ ,  $P = 0.1673$ ;  $P = 0.1414$ ,  $P =$   
836  $0.0639$ ,  $P = 0.0307$ . (F) Qualification of C4da axon regeneration by the regeneration index.  
837 *OptoRaf* (dark)  $N = 36$ , *optoRaf* (45-min off)  $N = 43$ , *optoRaf* (15-min off)  $N = 36$ , *optoRaf* (Con.  
838 on)  $N = 31$ , *optoAKT* (dark)  $N = 41$ , *optoAKT* (45-min off)  $N = 49$ , *optoAKT* (15-min off)  $N = 40$ ,  
839 *optoAKT* (Con. on)  $N = 52$  neurons. Data are mean  $\pm$  SEM, analyzed by one-way ANOVA  
840 followed by Dunnett's multiple comparisons test. (G-I) Blue light stimulation significantly  
841 enhances axon regeneration in the regeneration-incompetent C3da neurons. (G) C3da neuron

842 axon degeneration was verified at 24 h AI and axon regeneration was assessed at 48 h AI. The  
843 injury site is marked by the dashed circle, regenerated axons are demarcated by arrowheads, and  
844 arrow marks non-regenerated axons. Scale bar = 20  $\mu$ m. (H) The regeneration percentage is not  
845 significantly different. Fisher's exact test,  $P = 0.0874$ ,  $P = 0.9910$ ,  $P = 0.2972$ ,  $P = 1.0000$ . (I)  
846 Qualification of axon regeneration by the regeneration index. WT (light)  $N = 41$ , *optoRaf* (light)  
847  $N = 36$ , *optoRaf* (dark)  $N = 39$ , *optoAKT* (light)  $N = 34$ , *optoAKT* (dark)  $N = 38$  neurons. Data are  
848 mean  $\pm$  SEM, analyzed by one-way ANOVA followed by Dunnett's multiple comparisons test.  
849 \* $P < 0.05$ , \*\* $P < 0.01$ . See also Supplementary Fig. 2.



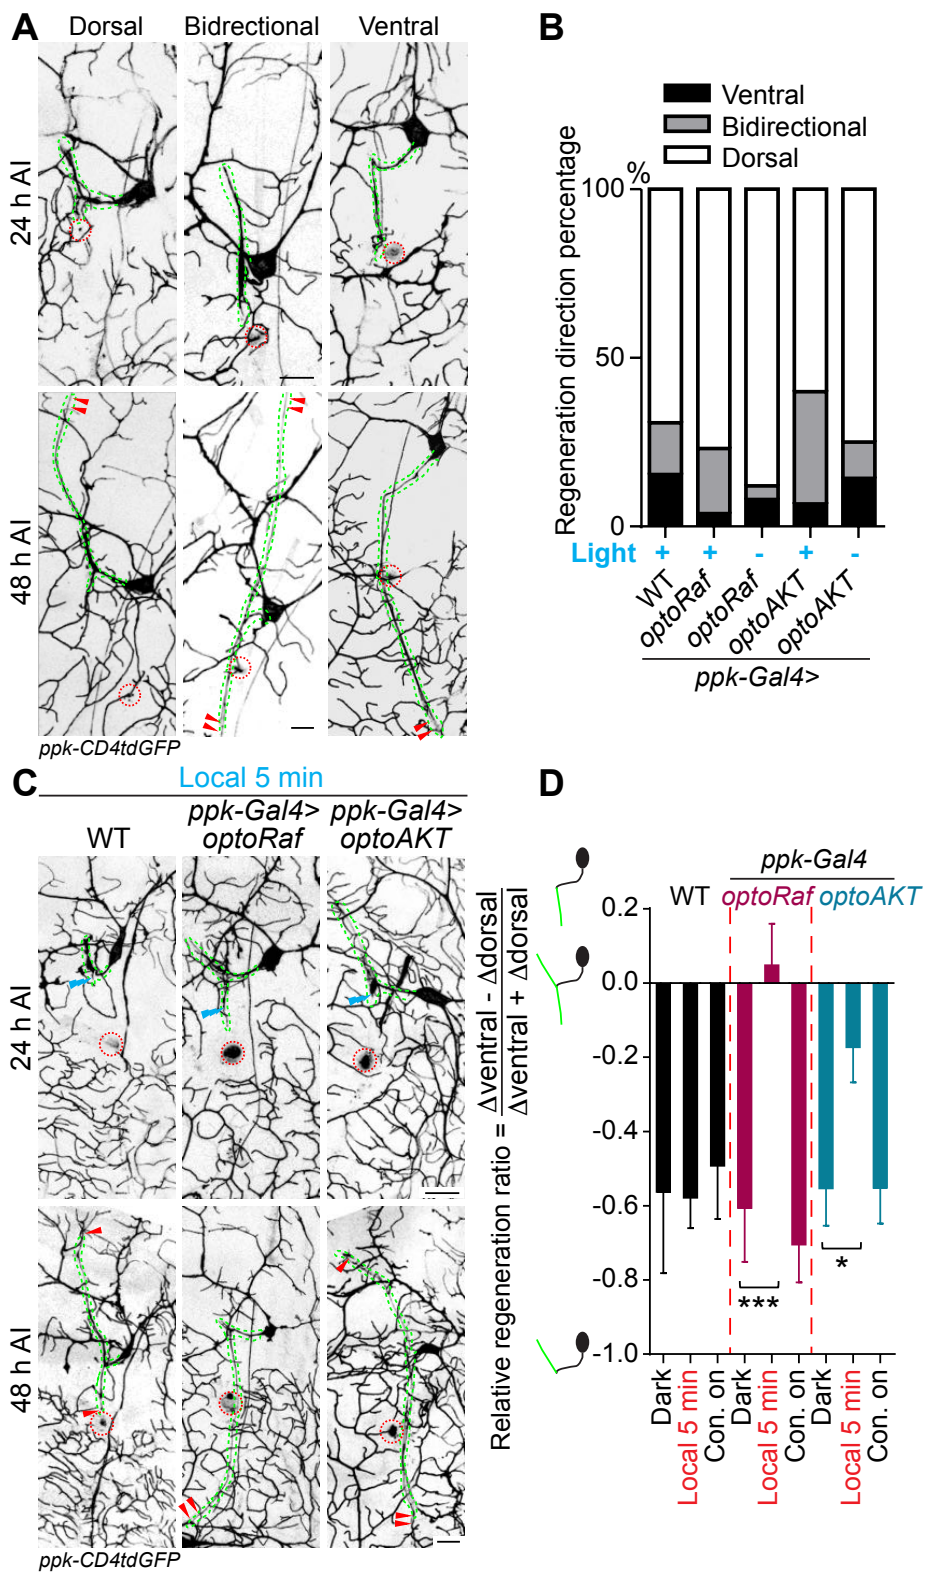

850

851 **Figure 4. Local optogenetic stimulation conveys guidance instructions to regenerating**  
852 **axons.** (A, B) Regenerating axons prefer to regrow away from the original trajectory, with only a  
853 minority of axons finding the correct path. (A) Representative images of axons retracting or  
854 bifurcating at 24 h AI. At 48 h AI in WT, regenerating axons extend dorsally, ventrally, or both  
855 directions. The injury site is marked by the dashed circles and regenerating axons are marked by  
856 arrowheads. Axons are outlined with dashed green lines. Scale bar = 20  $\mu\text{m}$ . (B) Light  
857 stimulation fails to increase the percentage of axons regrowing towards the right direction. The  
858 percentage of axons extending towards the correct trajectory (ventral + both) were analyzed by  
859 Fisher's exact test,  $P = 0.5318$ ,  $P = 0.1033$ ,  $P = 0.7778$ ,  $P = 0.6363$ . WT (light)  $N = 26$ , *optoRaf*  
860 (light)  $N = 26$ , *optoRaf* (dark)  $N = 25$ , *optoAKT* (light)  $N = 45$ , *optoAKT* (dark)  $N = 28$  neurons.  
861 (C, D) Restricted local activation of *optoRaf* or *optoAKT* significantly increases the relative  
862 regeneration ratio. The ratio is defined to weigh the regeneration potential of the ventral branch  
863 against the dorsal branch. (C) A single pulse of light stimulation delivered specifically on the  
864 ventral axon branch at 24 h AI (blue flash symbol) is capable of promoting preferential extension  
865 of regenerating axons in *optoRaf* or *optoAKT* expressing larvae. (D) Qualification of the relative  
866 regeneration ratio of v'ada. WT (dark)  $N = 32$ , WT (local 5 min)  $N = 32$ , WT (Con. on)  $N = 33$ ,  
867 *optoRaf* (dark)  $N = 33$ , *optoRaf* (local 5 min)  $N = 35$ , *optoRaf* (Con. on)  $N = 35$ , *optoAKT* (dark)  
868  $N = 33$ , *optoAKT* (local 5 min)  $N = 34$ , *optoAKT* (Con. on)  $N = 36$  neurons. Data are mean  $\pm$   
869 SEM, analyzed by one-way ANOVA followed by Dunnett's multiple comparisons test,  $*P <$   
870  $0.05$ ,  $***P < 0.001$ .

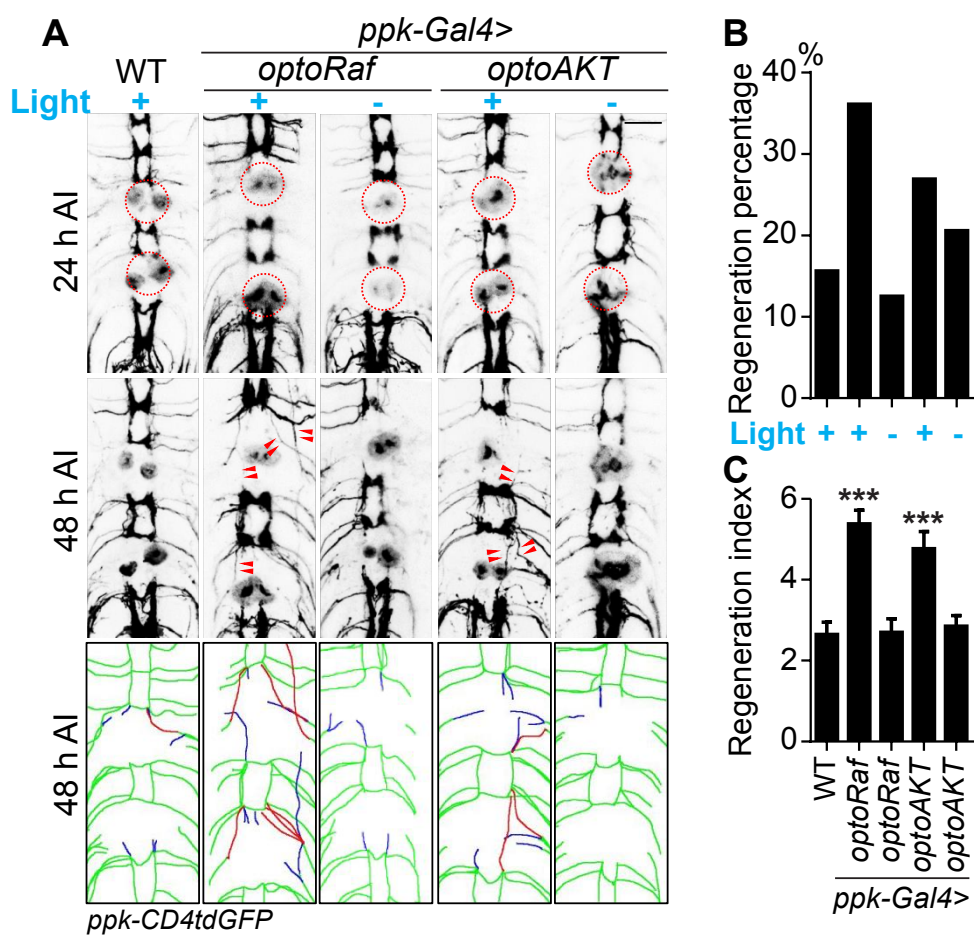



872 **Figure 5. Activation of optoRaf or optoAKT promotes axon regeneration in the CNS. (A-C)**

873 Light stimulation significantly enhances axon regeneration in the VNC of optoRaf or optoAKT  
874 expressing larvae. (A) Complete degeneration in A3 and A6 commissure segments was  
875 confirmed at 24 h AI and regeneration of these two segments was assayed independently at 48 h  
876 AI. The injury site is marked by the dashed circle and regenerating axons are labeled by  
877 arrowheads. In the schematic diagrams, regrowing axons that reached other bundles and thus  
878 define a regenerating commissure segment are highlighted in red, while other regrowing axons  
879 are illustrated in blue. Scale bar = 20  $\mu\text{m}$ . (B) The regeneration percentage is not significantly  
880 different. Fisher's exact test,  $P = 0.0560$ ,  $P = 0.7192$ ,  $P = 0.2908$ ,  $P = 0.6013$ . (C) Qualification  
881 of axon regeneration in VNC by the regeneration index. WT (light)  $N = 32$ , *optoRaf* (light)  $N =$   
882  $36$ , *optoRaf* (dark)  $N = 32$ , *optoAKT* (light)  $N = 26$ , *optoAKT* (dark)  $N = 34$  segments. Data are  
883 mean  $\pm$  SEM, analyzed by one-way ANOVA followed by Dunnett's multiple comparisons test,  
884 \*\*\* $P < 0.001$ . See also Supplementary Fig. 3.

885

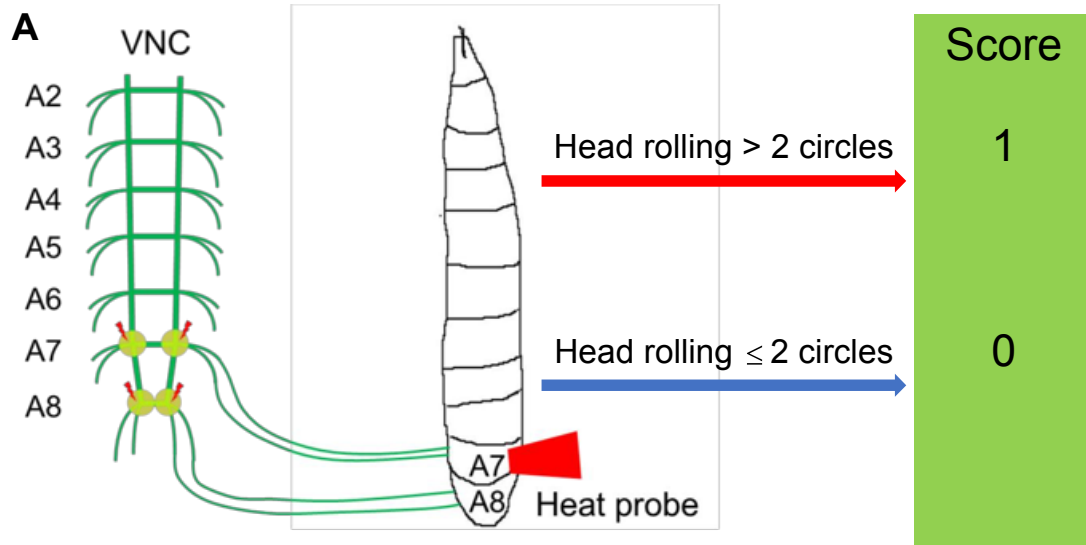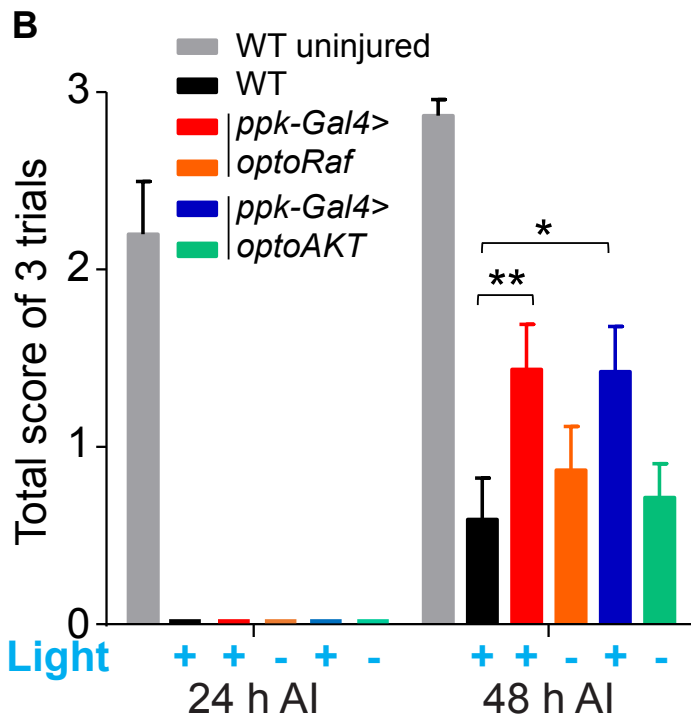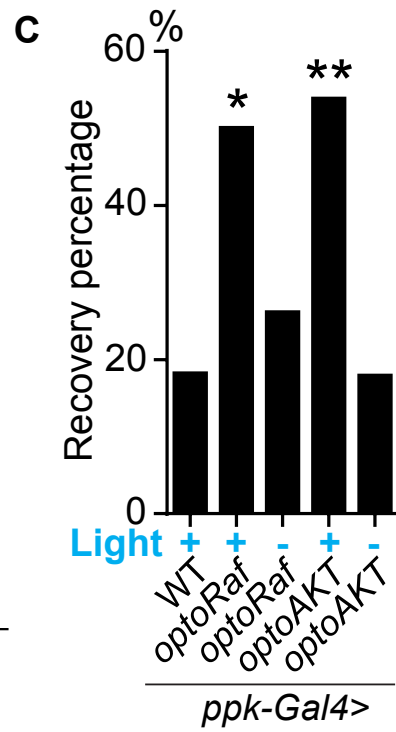

886

887

888 **Figure 6. Activation of optoRaf or optoAKT promotes functional regeneration after CNS**  
889 **injury.** (A) A schematic drawing of the behavioral recovery test. The A7 and A8 C4da neuron  
890 axon bundles (corresponding to the A7 and A8 body segments) in the VNC were injured by laser  
891 and the larva was then subjected to three consecutive trials at 24 and 48 h AI, respectively. In  
892 each trial, a 47°C heat probe was applied at the A7 or A8 segments. A fully recovered larva  
893 would produce a stereotypical rolling behavior in response to the heat probe and would be scored  
894 as “1”, otherwise as “0”. If the total score of the three trials was below 1 at 24 h AI but increased  
895 to 2 or 3 at 48 h AI, the larva was defined as recovered. (B, C) Behavioral recovery test was  
896 performed at 24 h and 48 h after VNC injury (A7 and A8 bundles). Larvae expressing optoRaf or  
897 optoAKT exhibit significantly accelerated recovery in response to light stimulation. (B)  
898 Qualification of the total scores at each time point. WT (uninjured)  $N = 15$ , WT (light)  $N = 22$ ,  
899 *optoRaf* (light)  $N = 32$ , *optoRaf* (dark)  $N = 23$ , *optoAKT* (light)  $N = 26$ , *optoAKT* (dark)  $N = 28$ .  
900 Data are mean  $\pm$  SEM, analyzed by two-way ANOVA followed by Tukey’s multiple  
901 comparisons test. (C) Qualification of the recovery percentage. The data were analyzed by  
902 Fisher’s exact test,  $P = 0.0174$ ,  $P = 0.5237$ ,  $P = 0.0052$ ,  $P = 0.9763$ . \* $P < 0.05$ , \*\* $P < 0.01$ .  
903

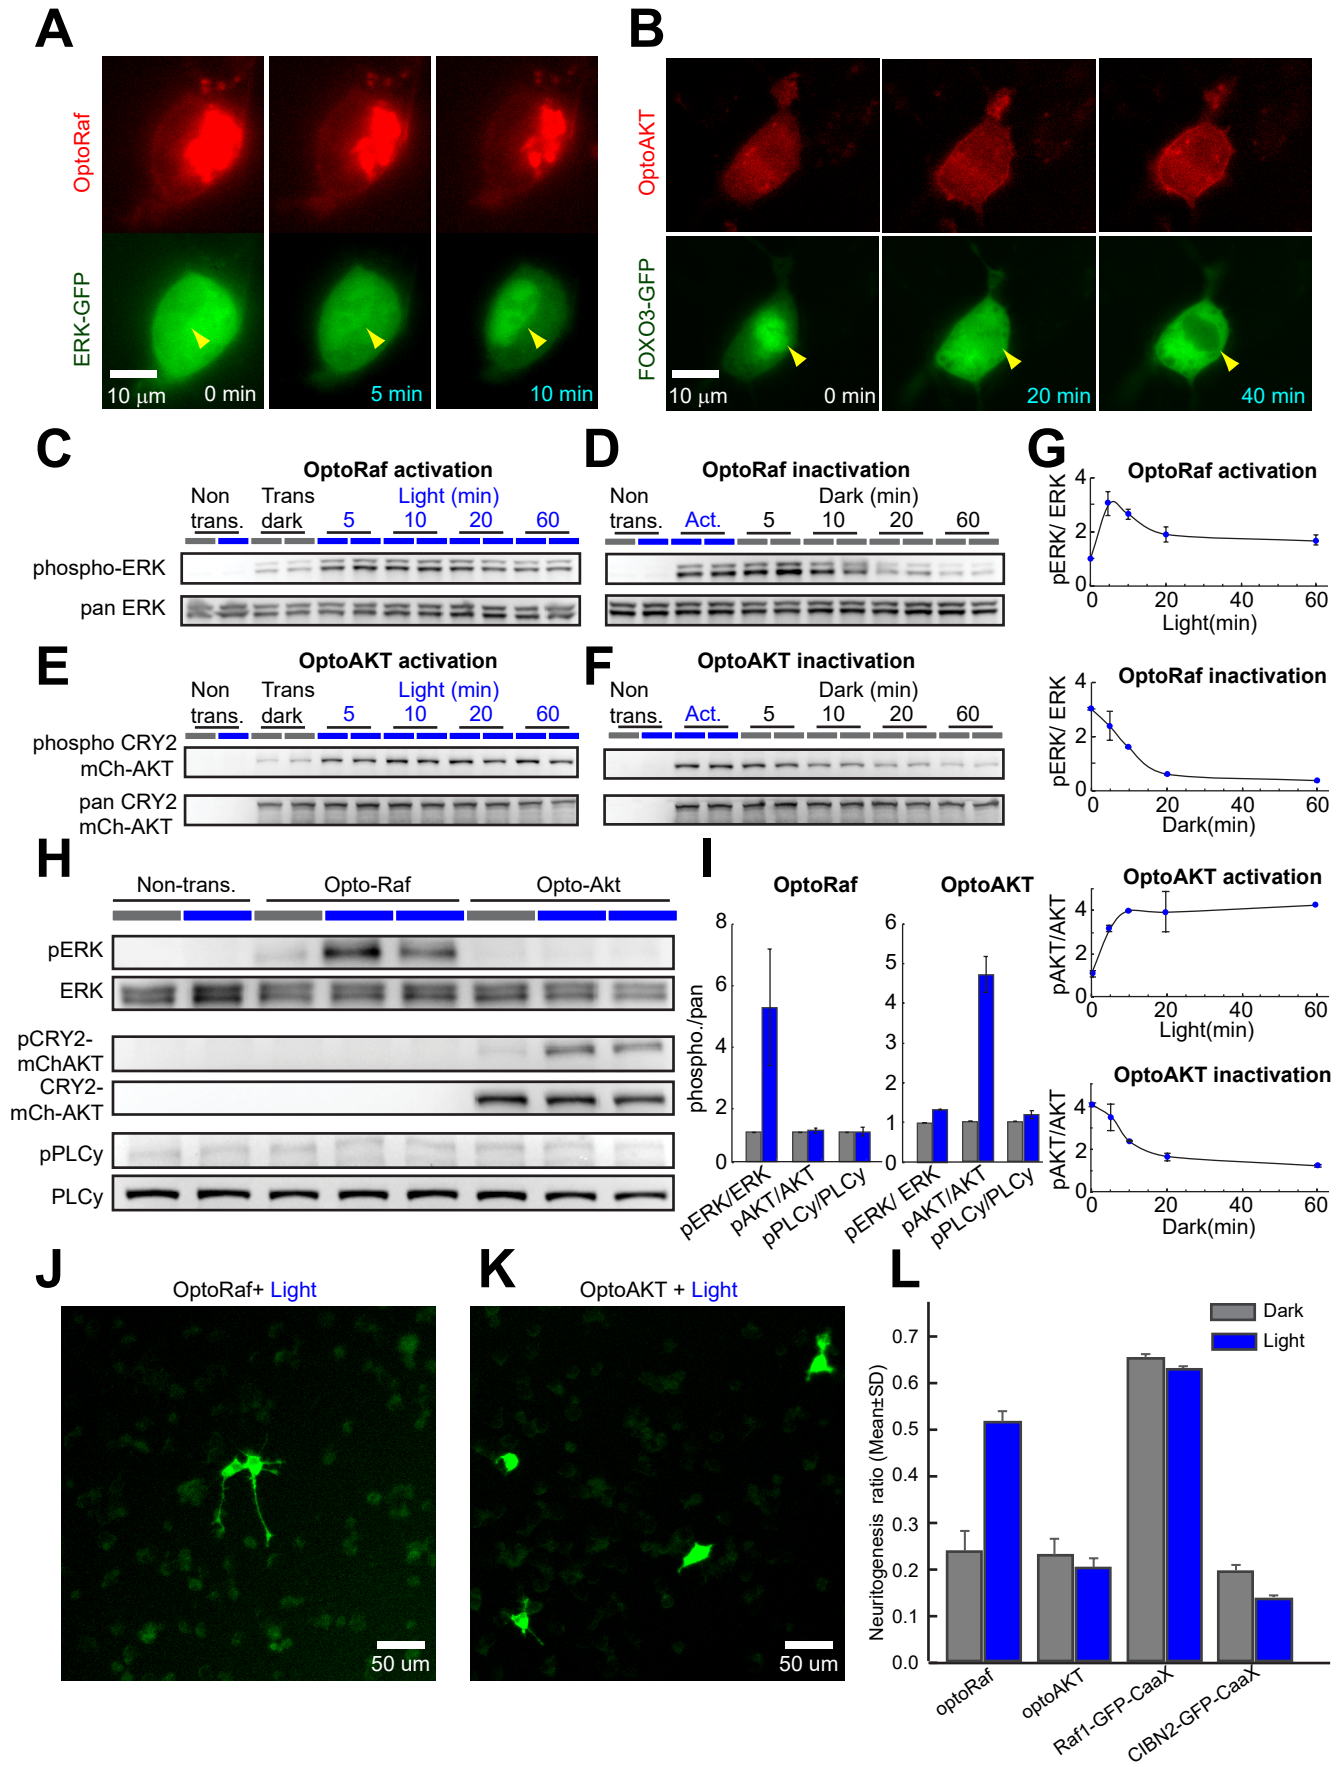



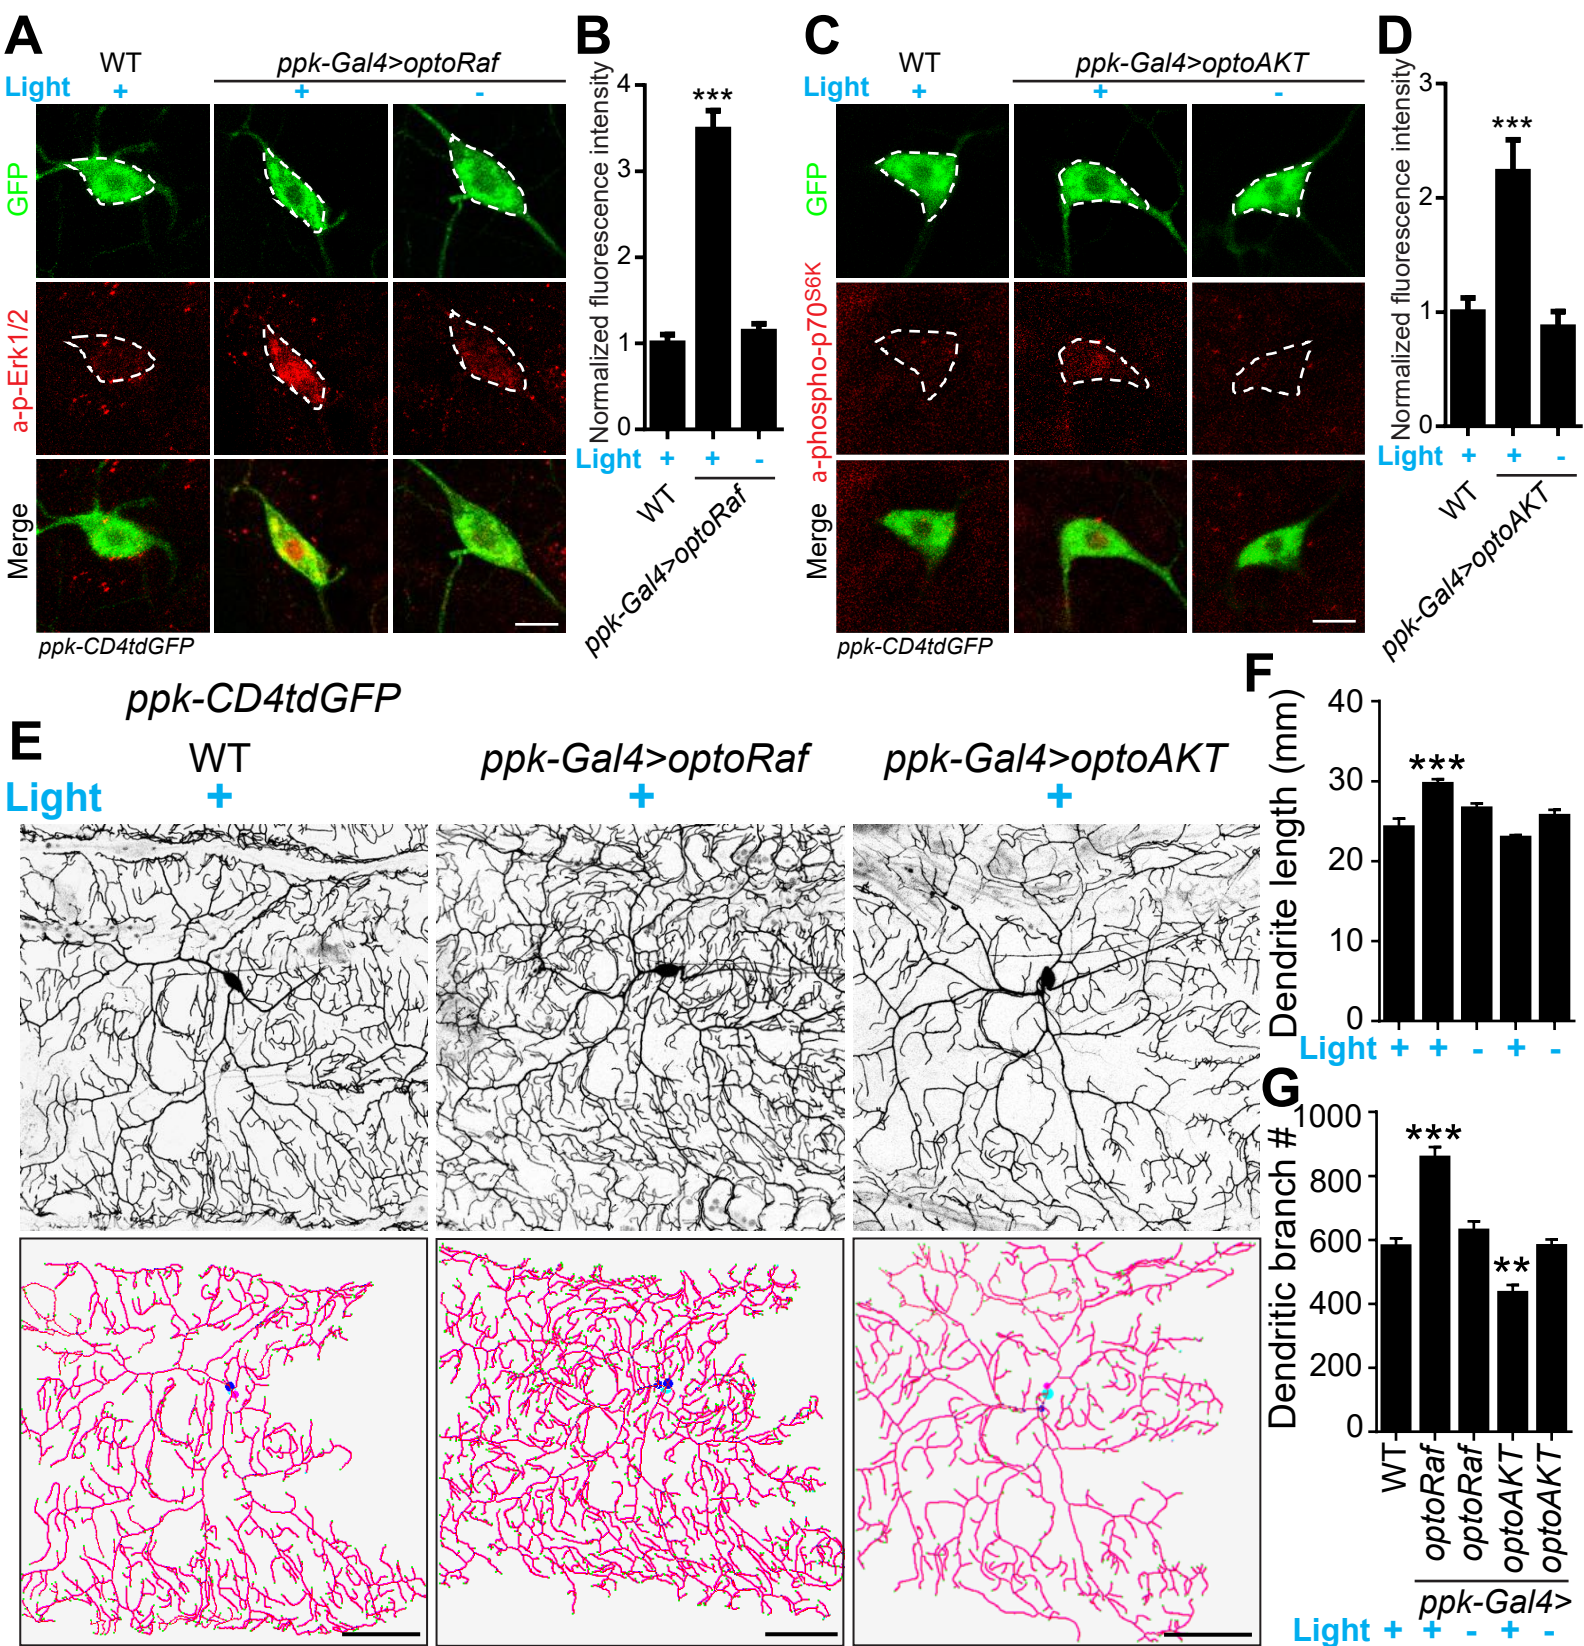



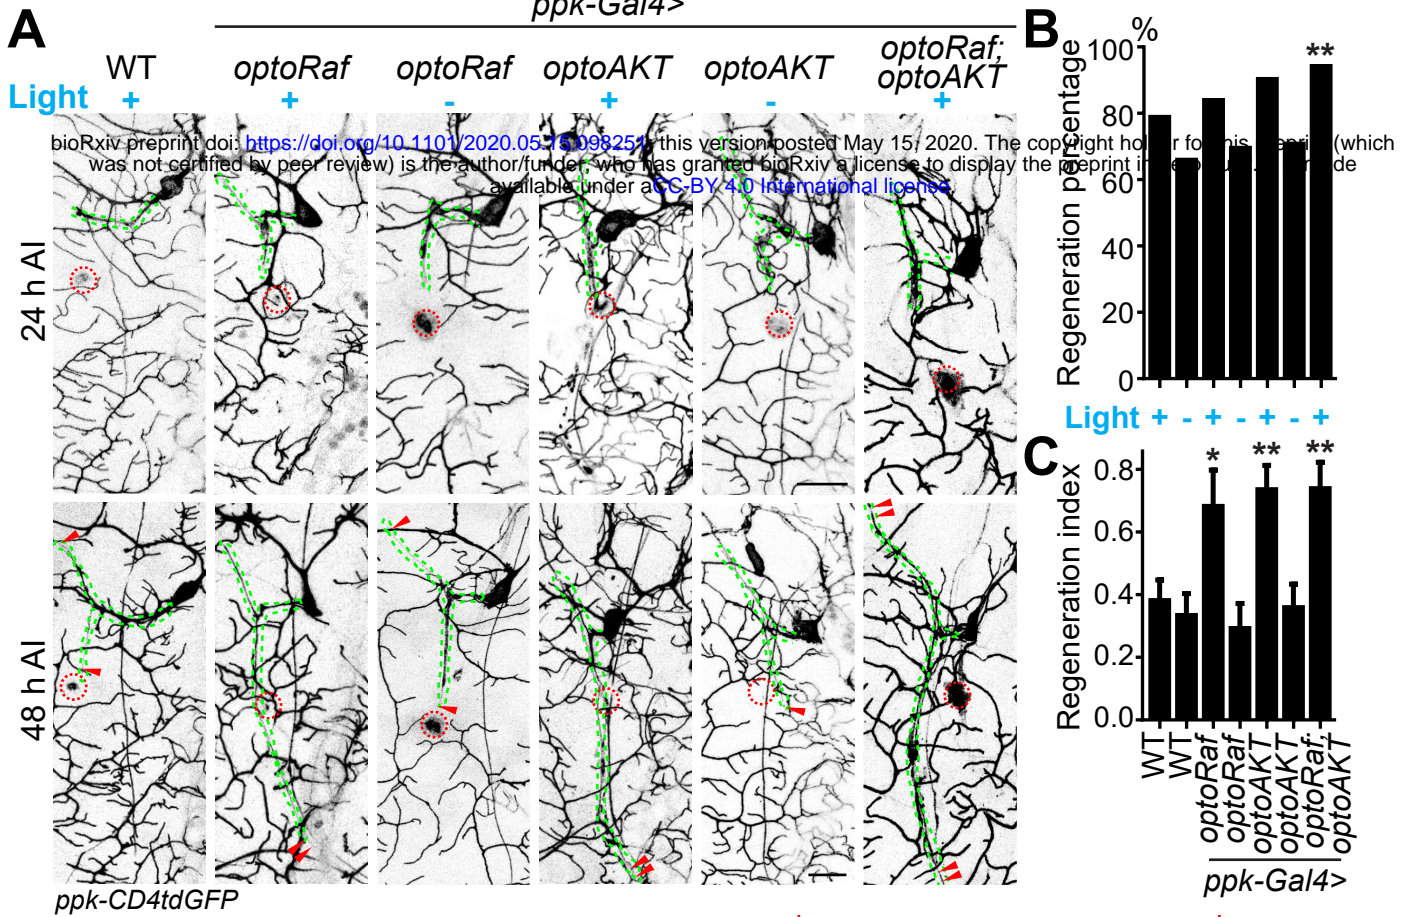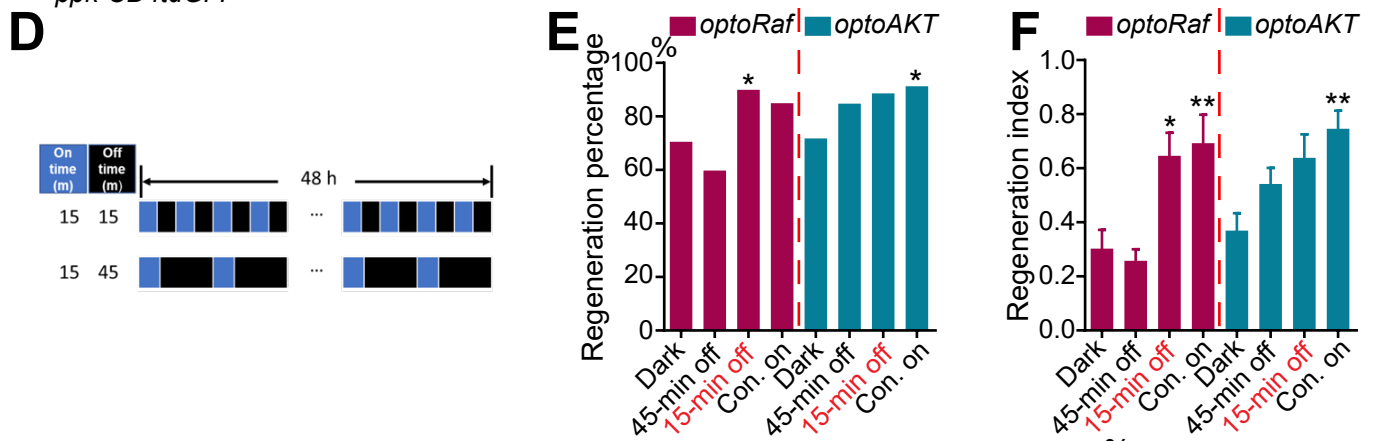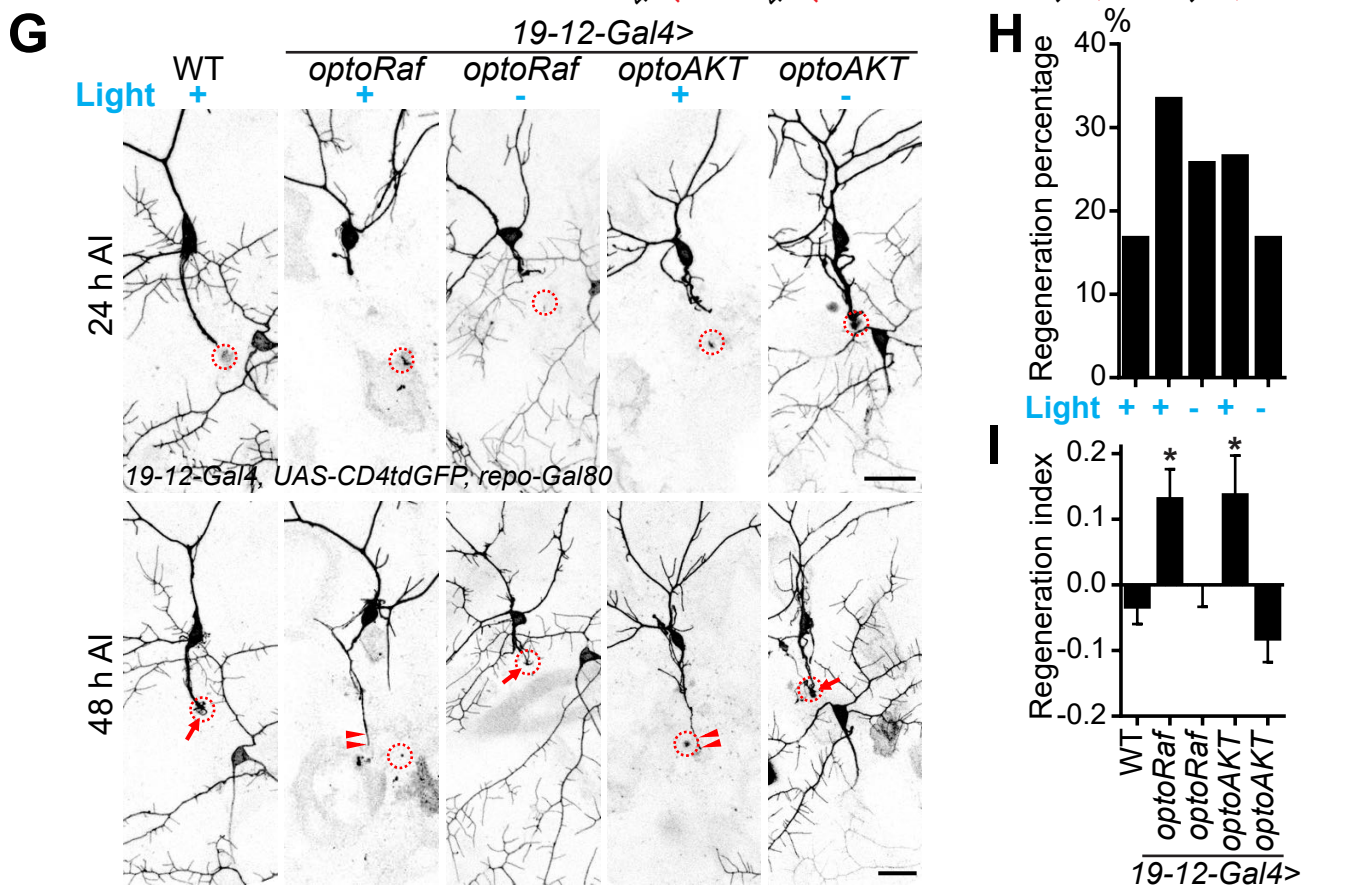



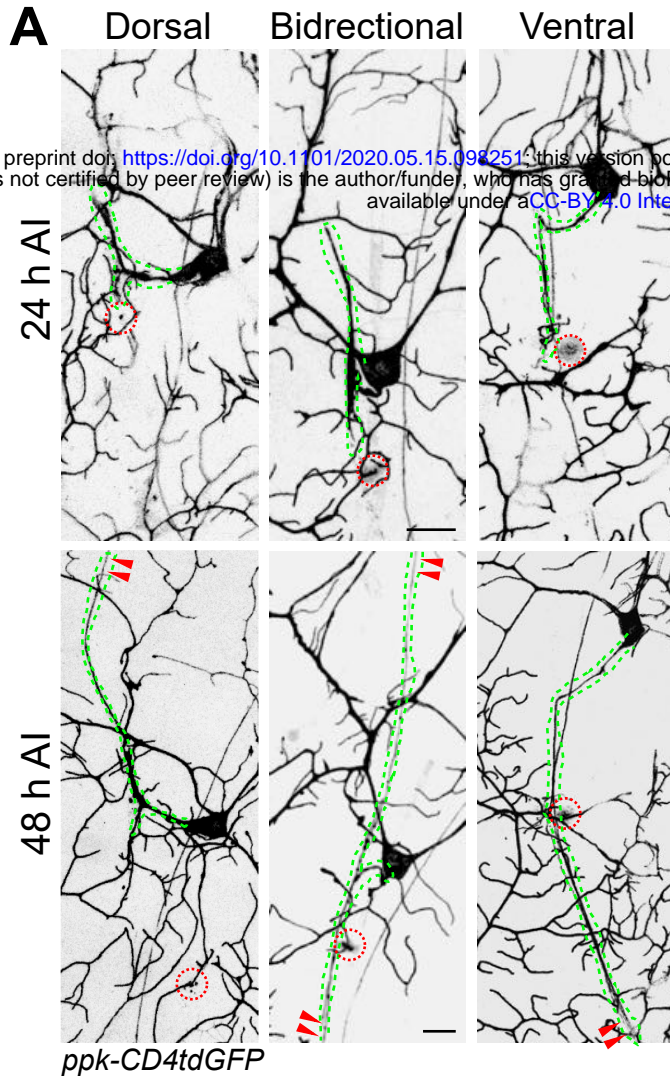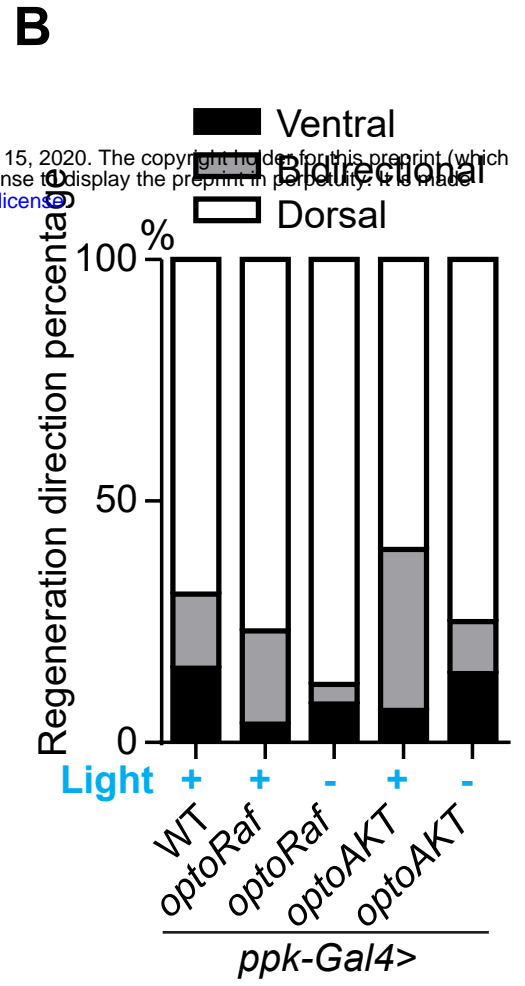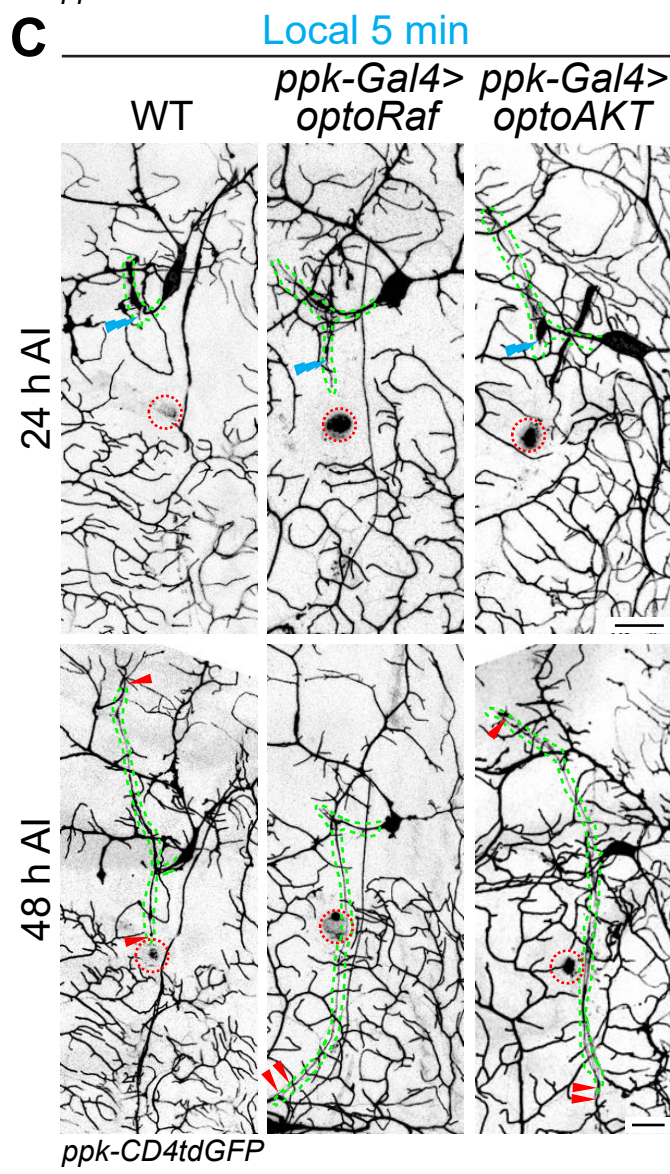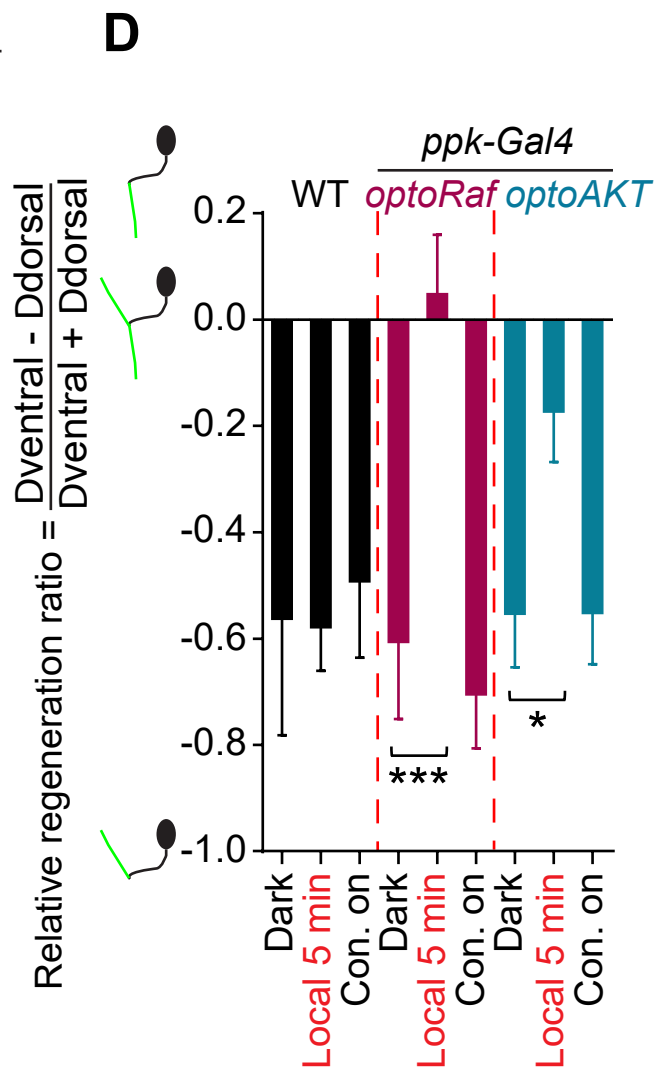

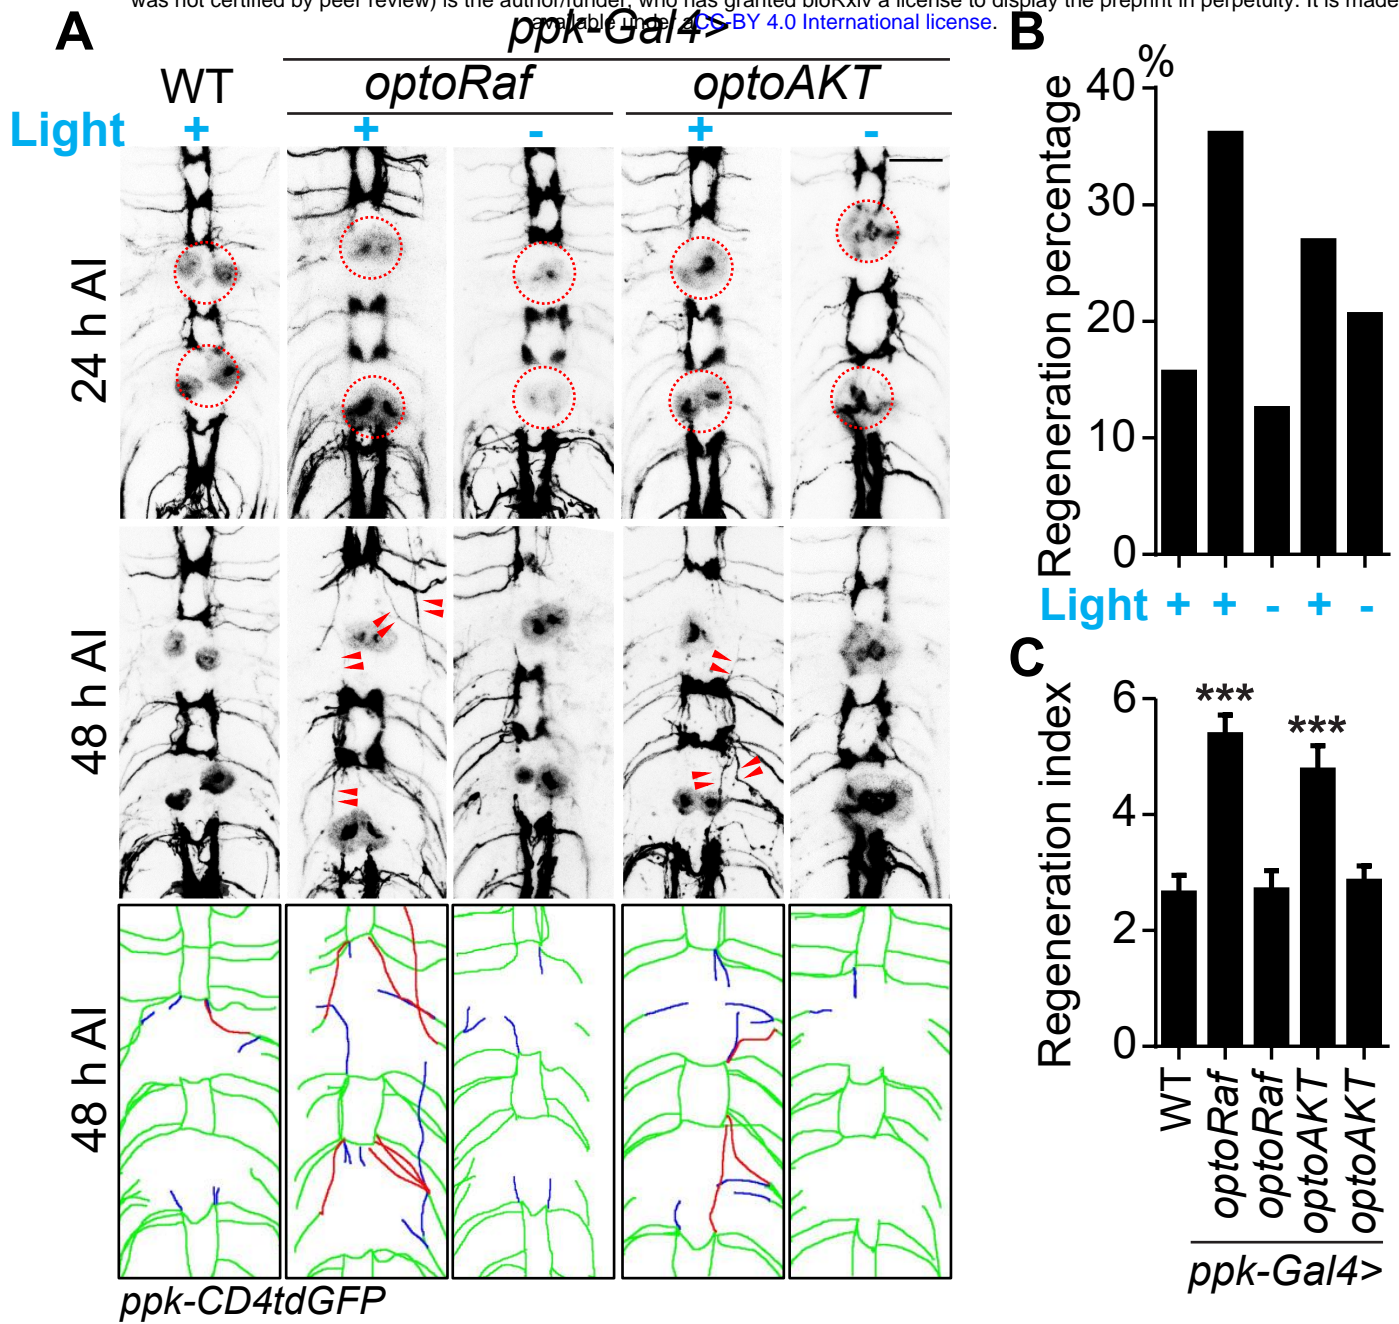



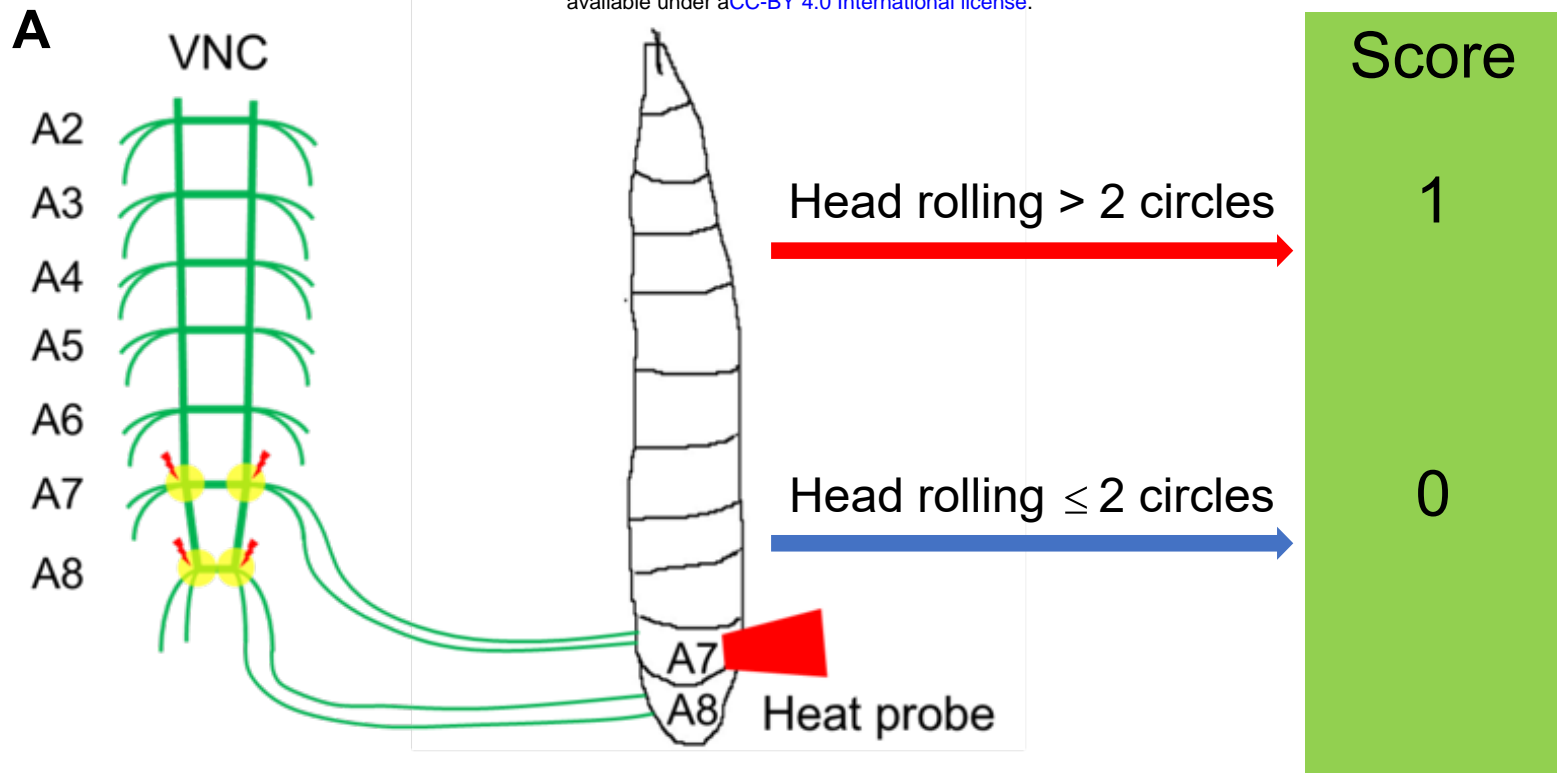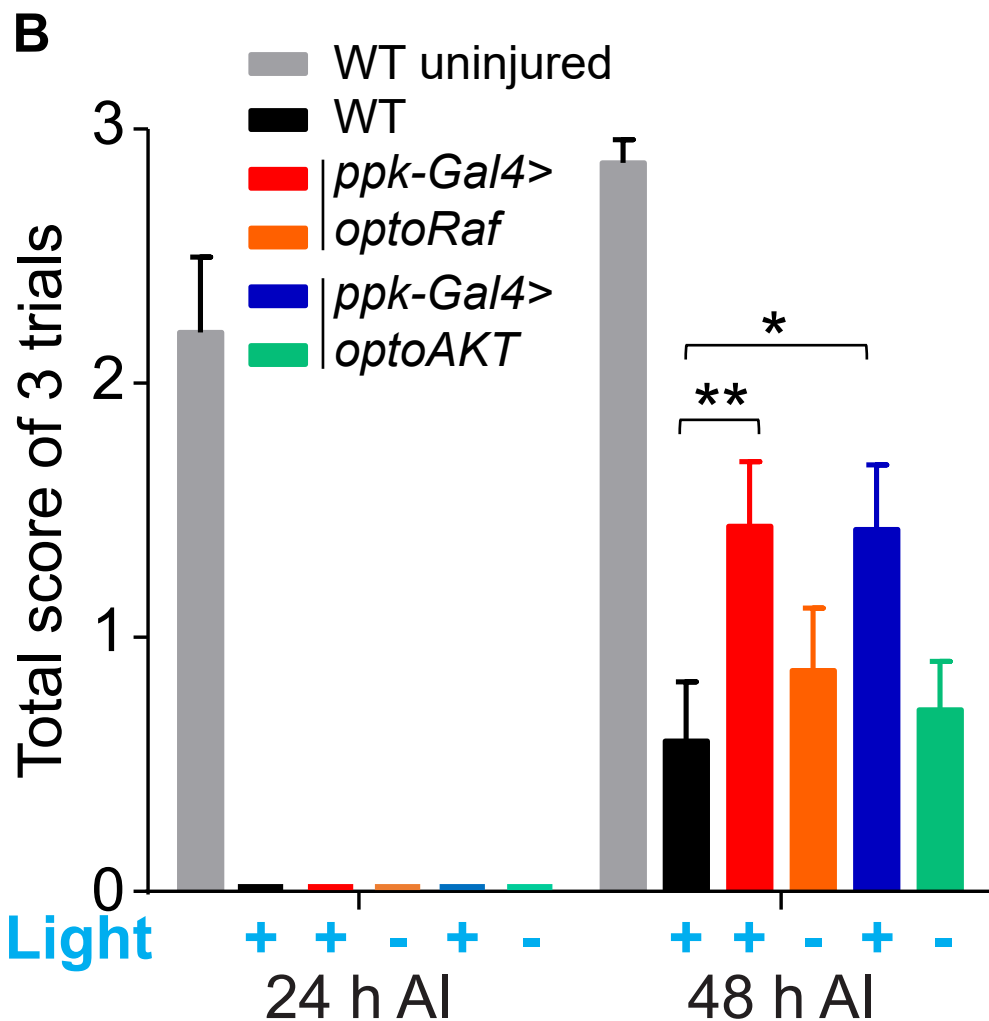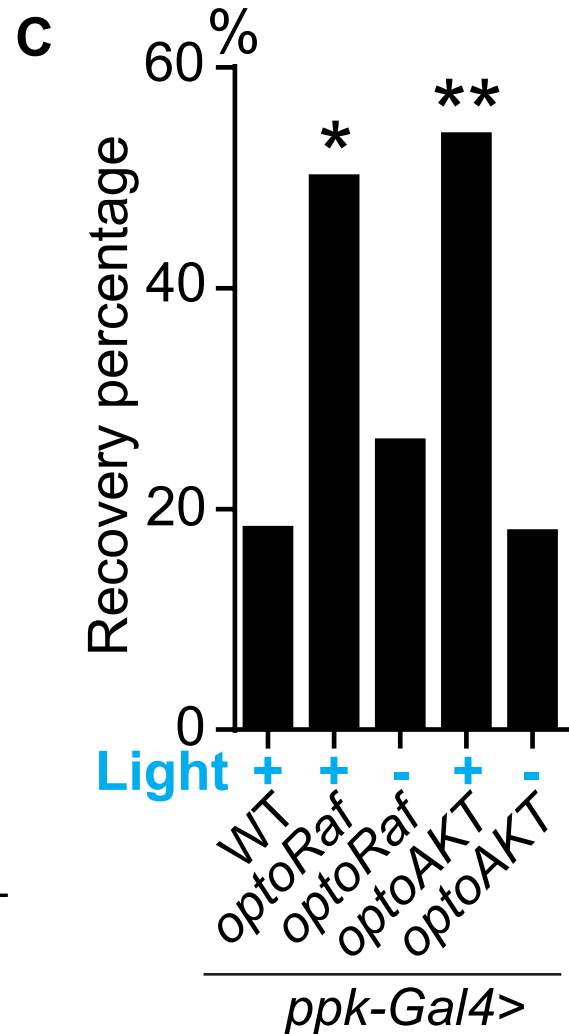

## Supplemental Data

### Optical control of ERK and AKT signaling promotes axon regeneration and functional recovery of PNS and CNS in *Drosophila*

Qin Wang<sup>1,2</sup>, Huaxun Fan<sup>3</sup>, Feng Li<sup>1,2</sup>, Savanna S. Skeeters<sup>3</sup>, Vishnu Krishnamurthy<sup>3</sup>, Yuanquan Song<sup>1,2,\*</sup>, Kai Zhang<sup>3,4,5,6,\*</sup>

<sup>1</sup>Raymond G. Perelman Center for Cellular and Molecular Therapeutics, The Children's Hospital of Philadelphia, Philadelphia, PA 19104, USA

<sup>2</sup>Department of Pathology and Laboratory Medicine, University of Pennsylvania, Philadelphia, PA 19104, USA

<sup>3</sup>Department of Biochemistry, <sup>4</sup>Neuroscience Program, <sup>5</sup>Center for Biophysics and Quantitative Biology, <sup>6</sup>Beckman Institute for Advanced Science and Technology, University of Illinois at Urbana-Champaign, Urbana, IL 61801, USA

\*Correspondence and requests for materials should be addressed to Y.S. (email: [songy2@email.chop.edu](mailto:songy2@email.chop.edu)) or to K.Z. (email: [kaizkaiz@illinois.edu](mailto:kaizkaiz@illinois.edu)).

## Contents

Supplementary Figures of the quantification of axon regeneration in the PNS and axon regeneration in the CNS.

**Supplementary Figure 1.** Design and live cell imaging for optoRaf and optoAKT in mammalian cell cultures.

**Supplementary Figure 2.** Quantification of axon regeneration in the PNS.

**Supplementary Figure 3.** Quantification of axon regeneration in the CNS.

Supplementary movies of reversible optogenetic stimulation of Raf and AKT membrane recruitment, nuclear translocation of ERK, nuclear retreatment of FOXO3-GFP with optoRaf resolved by live-cell imaging:

**Movie S1:** Reversible optogenetic stimulation of Raf membrane recruitment with optoRaf resolved by live-cell imaging in BHK21 cells.

**Movie S2:** Reversible optogenetic stimulation of AKT membrane recruitment with optoAKT resolved by live-cell imaging in BHK21 cells.

**Movie S3:** Optogenetic activation of optoRaf causes nuclear translocation of ERK-GFP in BHK21 cells.

**Movie S4:** Optogenetic activation of optoAKT causes retreatment of FOXO3-GFP from the nucleus into the cytoplasm in BHK21 cells.

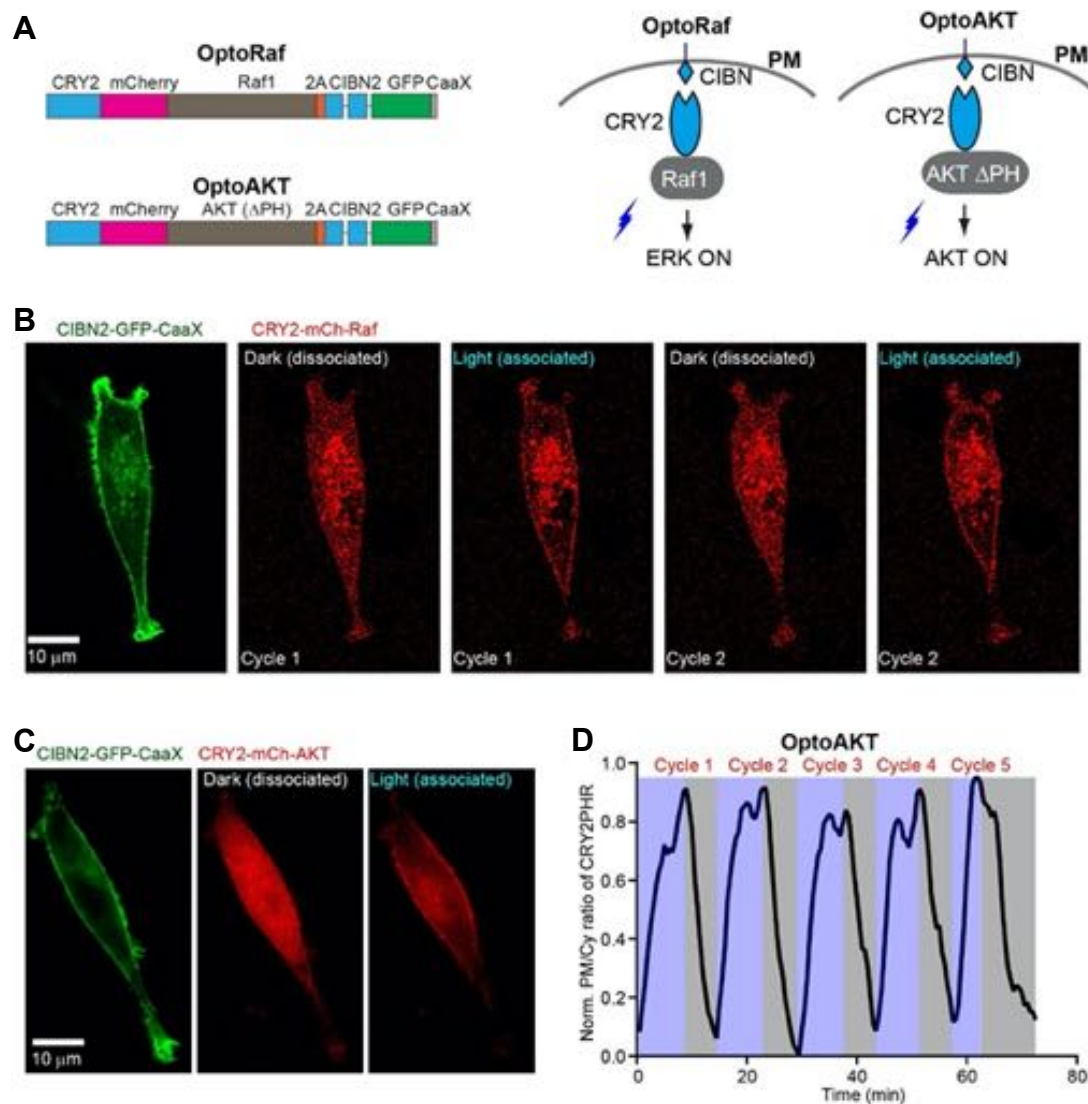

**Supplementary Figure 1. Design and live cell imaging for optoRaf and optoAKT in mammalian cell cultures.** (A) Blue light illumination facilitates the association of CIBN and CRY2, and the CIBN/CRY2 complex spontaneously dissociates in the dark. In both optoRaf and optoAKT, CIBN-GFP-CaaX anchors to the plasma membrane and the cytosolic signaling protein was fused to CRY2. Under blue light stimulation, optoRaf and optoAKT recruit the signaling protein, Raf1 (optoRaf) and AKT  $\Delta$ PH (optoAKT) to the plasma membrane to activate the ERK and AKT signaling pathway, respectively. (B, C) Live-cell imaging of reversible membrane recruitment of CRY2-mCh-Raf (B) CRY2-mCh-AKT (C). After each cycle of light stimulation, cells were kept in the dark for about 30 min. (D) Multiple cycles of membrane recruitment can be achieved from the same cell.

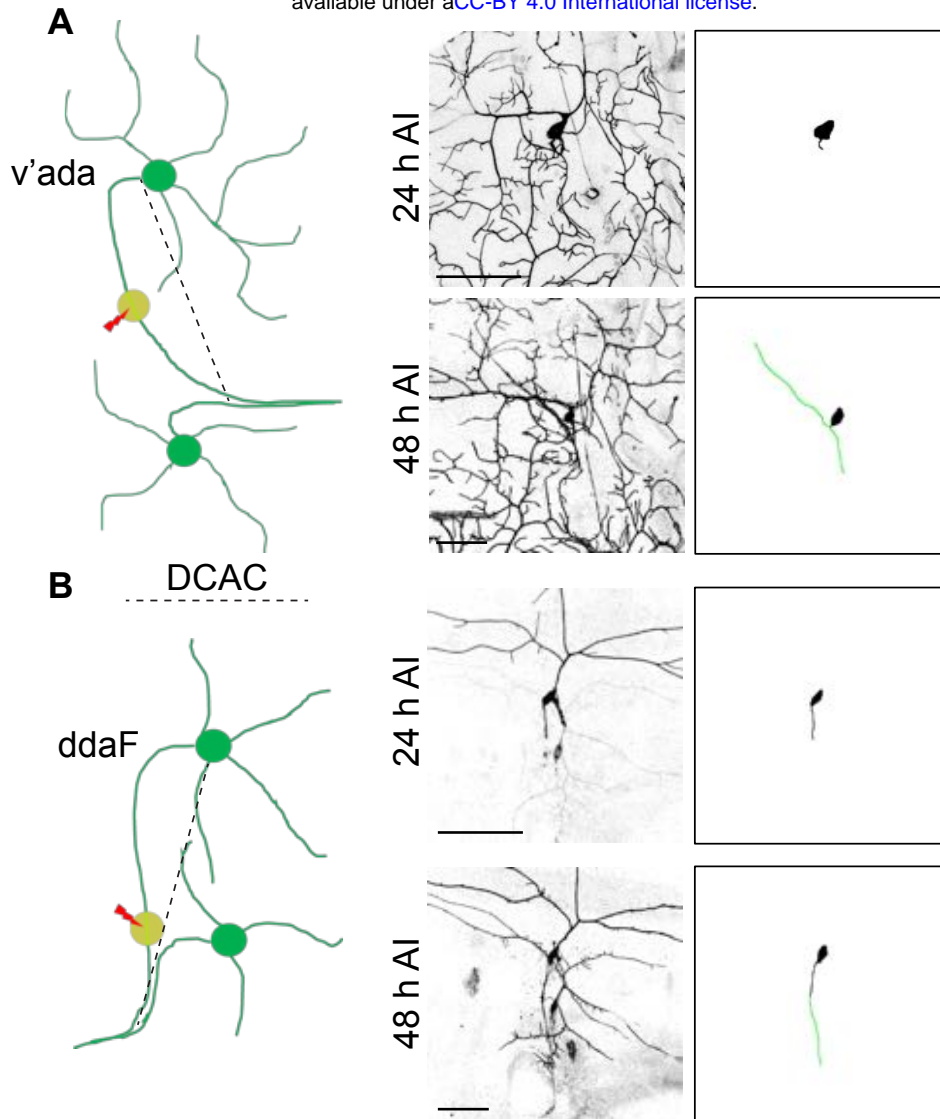

**Supplementary Figure 2. Quantification of axon regeneration in the PNS.** (A) A schematic diagram depicts the C4da neuron injury model. At 48 h AI, two branches of the regenerating axon are extended towards two opposite directions. To calculate the regeneration index, the increased length of the longer branch was measured and normalized by DCAC (the distance between the cell body and the axon converging point). Scale bar = 50  $\mu$ m. (B) A schematic drawing depicts the C3da neuron injury model. The green line depicts the regenerated axon. Scale bar = 50  $\mu$ m. Related to **Figure 3**.

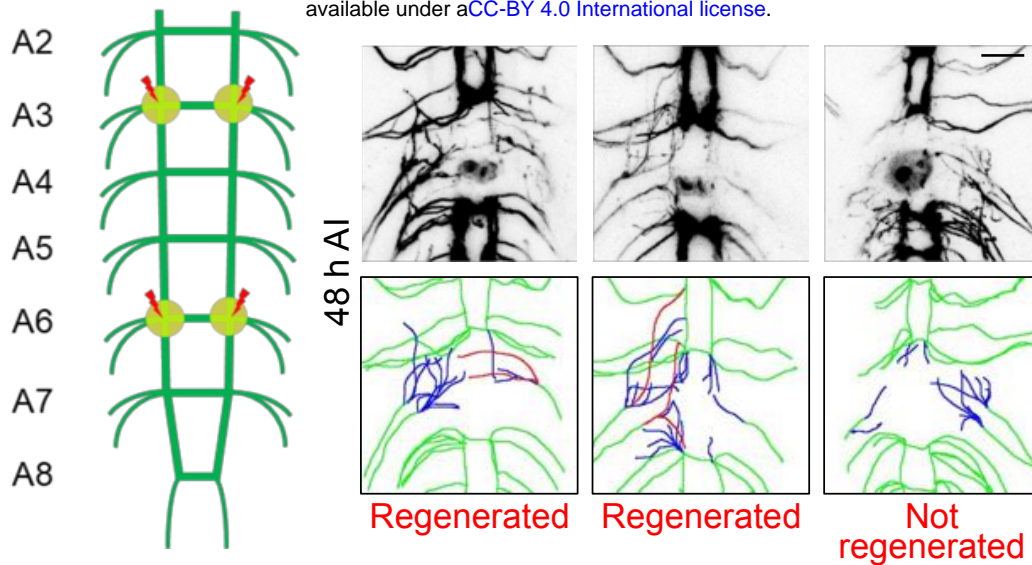

**Supplementary Figure 3. Quantification of axon regeneration in the CNS.** A schematic diagram of the VNC injury method. The abdominal A3 and A6 bundles were injured by laser and the regeneration of these two commissure segments were assessed independently at 48 h AI. The regeneration index is defined as the total length of all regenerated axons normalized to the length between A4 and A5 bundles. However, a commissure segment is defined as regenerated only when at least one axon extends beyond the midline of the commissure region or connects with other intact bundles. Those axons are illustrated in the schematic diagrams in red, while other regrowing axons are in blue. Scale bar = 20  $\mu$ m. Related to **Figure 5**.
